# Supplementary material for: Engineered unnatural ubiquitin for optimal detection of deubiquitinating enzymes
Source: Royal Society of Chemistry journal article supplement (doi:10.1039/d0sc01347a), 2020-01-01

## Supplementary Information

### Engineered unnatural ubiquitin for optimal detection of deubiquitinating enzymes

Wioletta Rut<sup>1\*</sup>, Mikolaj Zmudzinski<sup>1</sup>, Scott J. Snipas<sup>2</sup>, Miklos Bekes<sup>3,4</sup>, Tony T. Huang<sup>3</sup>, Marcin Drag<sup>1,2\*</sup>

<sup>1</sup>Department of Chemical Biology and Bioimaging, Wrocław University of Science and Technology, Wyb. Wyspińskiego 27, 50-370 Wrocław, Poland

<sup>2</sup>Sanford Burnham Prebys Medical Discovery Institute, 10901 North Torrey Pines Road, La Jolla, CA 92037, USA

<sup>3</sup>Department of Biochemistry & Molecular Pharmacology, New York University School of Medicine, New York, NY 10016, USA

<sup>4</sup>present address: Arvinas, Inc., 5 Science Park, New Haven, CT, 06511, USA

\*corresponding authors: wioletta.rut@pwr.edu.pl, marcin.drag@pwr.edu.pl

#### Content of Supporting Information

|                                                                           |         |
|---------------------------------------------------------------------------|---------|
| 1. Supplementary Figure.....                                              | S2-S4   |
| 2. Supplementary Tables.....                                              | S5-S15  |
| 3. Analysis data of synthesized substrates and activity-based probes..... | S16-S40 |

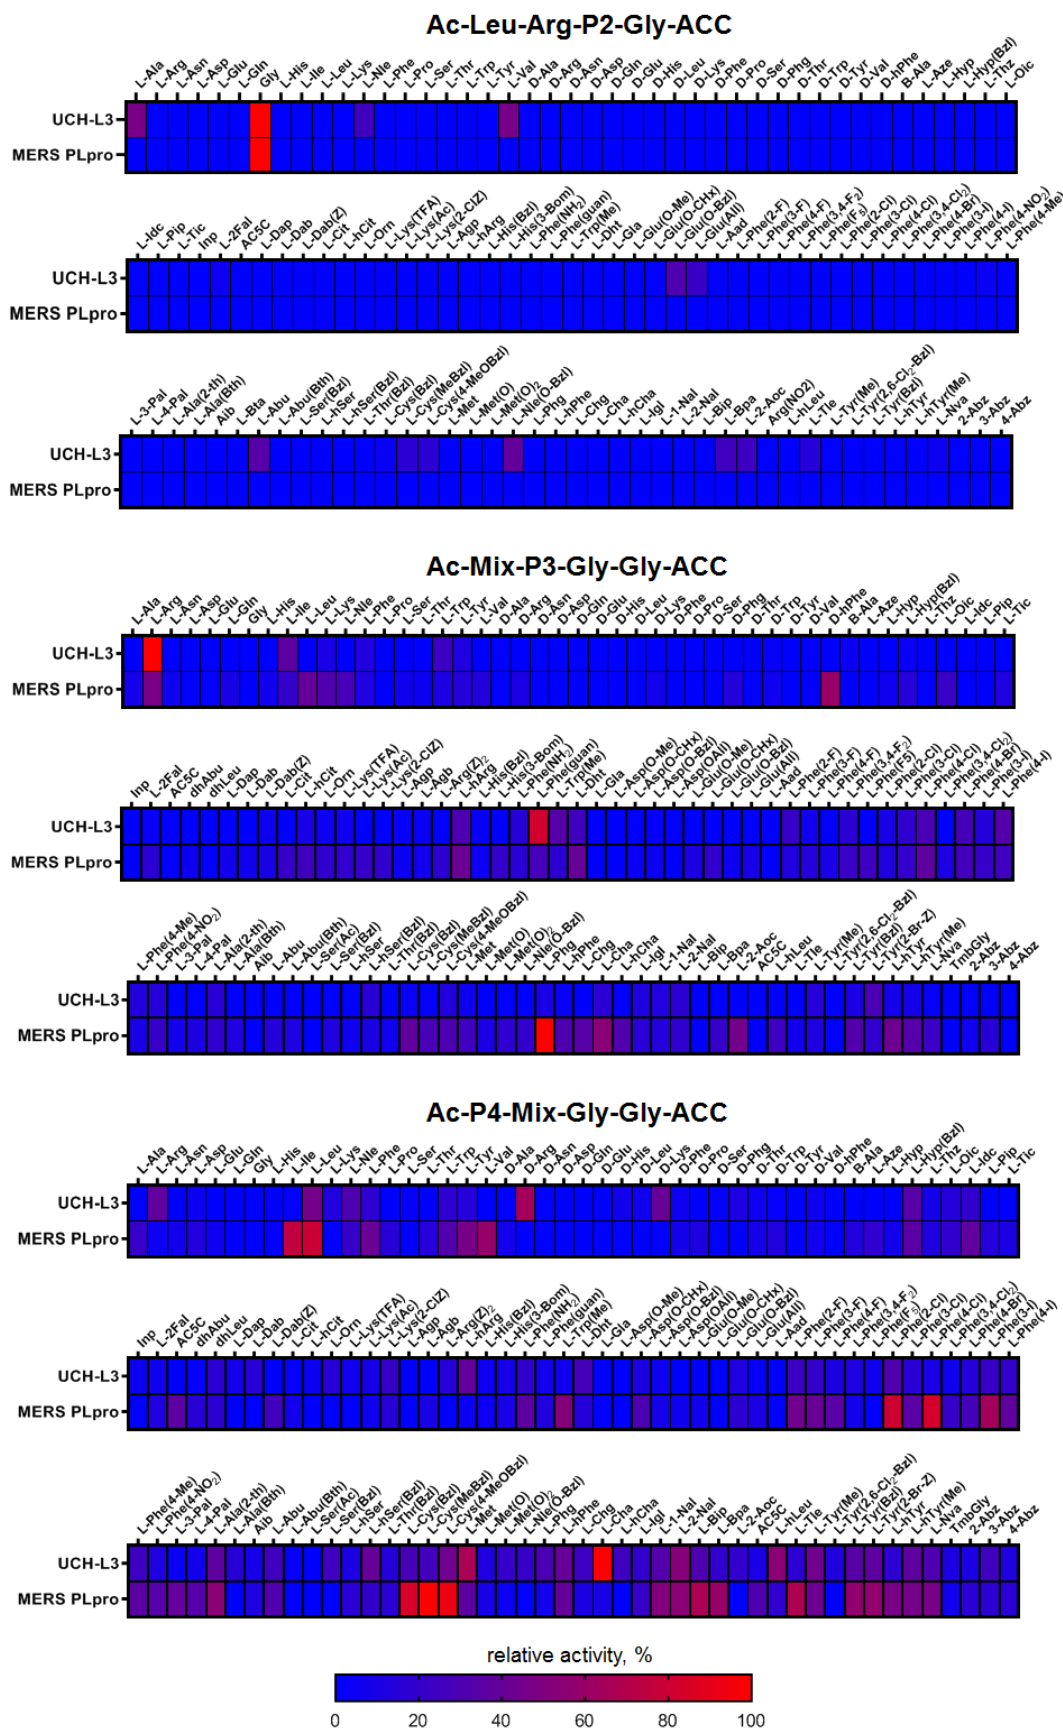

**Figure S1.** DUBs substrate specificity profiles presented as heat maps.

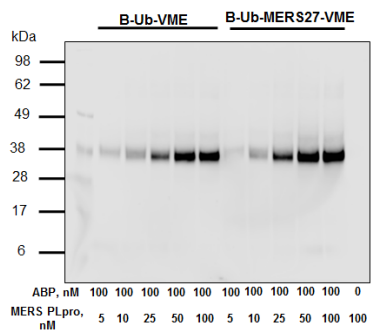

**Figure S2.** MERS PLpro labelling by Ub-based probes. Ub-based probes (100 nM) were incubated with different enzyme concentrations for 30 min at 37°C. Then SDS-PAGE analysis was performed.

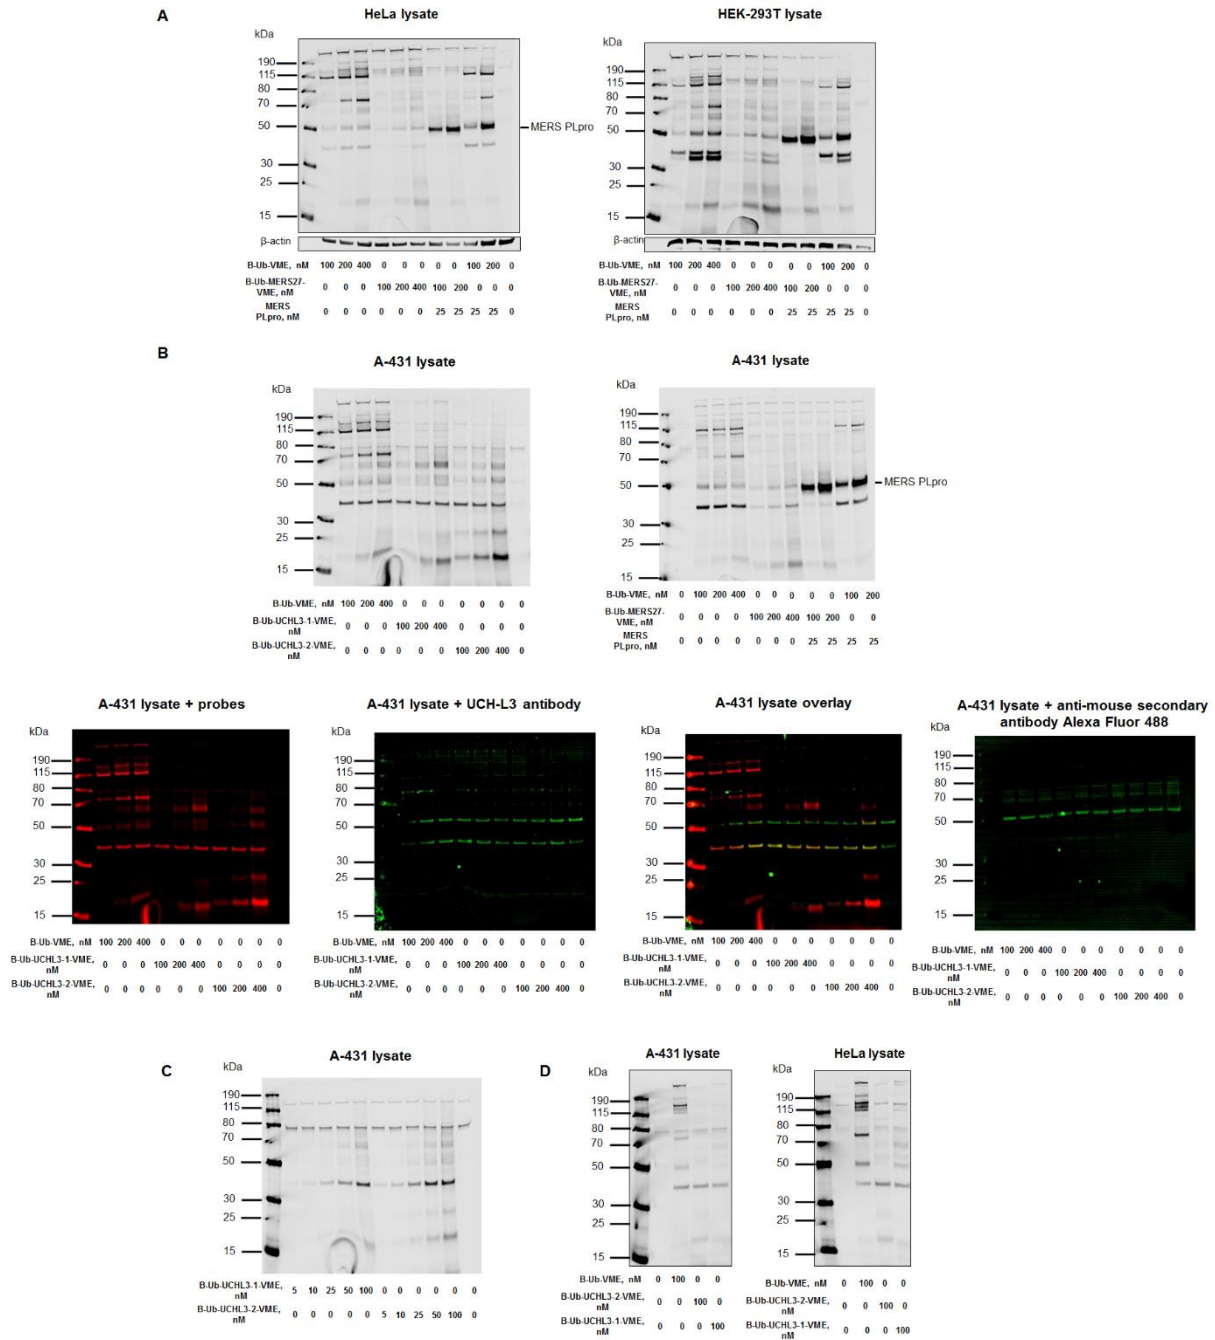

**Figure S3. Ub-based probe selectivity.**

(A) DUB labeling in cell lysates by B-Ub-VME and B-Ub-MERS27-VME (B) DUB labeling in cell lysates by B-Ub-UCHL3-1-VME, B-Ub-UCHL3-2-VME and anti-UCH-L3 antibody. The second band at ca. 50 kDa which is presented on the membrane “A431-lysate + UCH-L3 antibody” is unspecific labelling of protein from lysate by secondary antibody (goat anti-mouse IgG secondary antibody Alexa Fluor 488). This unspecific labelling was confirmed by re-running the gel and incubating membrane only with anti-mouse secondary antibody Alexa Fluor 488 (without anti-UCH-L3 antibody). (C) Dose-dependent labelling of UCH-L3 in A-431 lysate by Ub-probes. (D) Pull-down experiment using B-Ub-VME, B-Ub-UCHL3-1-VME and B-Ub-UCHL3-2-VME. A-431 and HeLa lysates were incubated with or without probes for 30 min at 37°C. Then streptavidin beads were added and samples were incubated for 2.5 h at 4°C. Samples were analyzed by gel electrophoresis, followed by western blotting.

**Table S1.** Calculated and found m/z for Ac-Leu-Arg-P2-Gly-ACC substrate library.

| <b>Substrate</b> | <b>Ac-Leu-Arg-P2-Gly-ACC</b> | <b>m/z<sub>calcd</sub></b> | <b>m/z<sub>found</sub></b> |
|------------------|------------------------------|----------------------------|----------------------------|
| P2/1             | L-Ala                        | 658.3308                   | 658.28                     |
| P2/2             | L-Arg                        | 743.3948                   | 743.37                     |
| P2/3             | L-Asn                        | 701.3366                   | 701.30                     |
| P2/4             | L-Asp                        | 702.3206                   | 702.28                     |
| P2/5             | L-Glu                        | 716.3363                   | 716.30                     |
| P2/6             | L-Gln                        | 715.3522                   | 715.15                     |
| P2/7             | Gly                          | 644.3151                   | 644.15                     |
| P2/8             | L-His                        | 724.3526                   | 724.25                     |
| P2/9             | L-Ile                        | 700.3777                   | 700.28                     |
| P2/10            | L-Leu                        | 700.3777                   | 700.29                     |
| P2/11            | L-Lys                        | 715.3886                   | 715.30                     |
| P2/12            | L-Nle                        | 700.3777                   | 700.20                     |
| P2/13            | L-Phe                        | 734.3621                   | 734.23                     |
| P2/14            | L-Pro                        | 684.3464                   | 684.19                     |
| P2/15            | L-Ser                        | 674.3257                   | 674.19                     |
| P2/16            | L-Thr                        | 688.3413                   | 688.21                     |
| P2/17            | L-Trp                        | 773.3730                   | 773.29                     |
| P2/18            | L-Tyr                        | 750.3570                   | 750.27                     |
| P2/19            | L-Val                        | 686.3621                   | 686.26                     |
| P2/20            | D-Ala                        | 658.3308                   | 658.20                     |
| P2/21            | D-Arg                        | 743.3948                   | 743.29                     |
| P2/22            | D-Asn                        | 701.3366                   | 701.24                     |
| P2/23            | D-Asp                        | 702.3206                   | 702.22                     |
| P2/24            | D-Gln                        | 715.3522                   | 715.25                     |
| P2/25            | D-Glu                        | 716.3363                   | 716.23                     |
| P2/26            | D-His                        | 724.3526                   | 724.27                     |
| P2/27            | D-Leu                        | 700.3777                   | 700.28                     |
| P2/28            | D-Lys                        | 715.3886                   | 715.29                     |
| P2/29            | D-Phe                        | 734.3621                   | 734.28                     |
| P2/30            | D-Pro                        | 684.3464                   | 684.22                     |
| P2/31            | D-Ser                        | 674.3257                   | 674.21                     |
| P2/32            | D-Phg                        | 720.3464                   | 720.25                     |
| P2/33            | D-Thr                        | 688.3413                   | 688.23                     |
| P2/34            | D-Trp                        | 773.3730                   | 773.31                     |
| P2/35            | D-Tyr                        | 750.3570                   | 750.30                     |
| P2/36            | D-Val                        | 686.3621                   | 686.25                     |
| P2/37            | D-hPhe                       | 748.3777                   | 748.29                     |
| P2/38            | β-Ala                        | 658.3308                   | 658.21                     |
| P2/39            | L-Aze                        | 670.3308                   | 670.23                     |
| P2/40            | L-Hyp                        | 700.3413                   | 700.22                     |
| P2/41            | L-Hyp(Bzl)                   | 790.3883                   | 790.23                     |
| P2/42            | L-Thz                        | 702.3029                   | 702.12                     |
| P2/43            | L-Oic                        | 738.3934                   | 738.23                     |
| P2/44            | L-Idc                        | 732.3464                   | 732.18                     |
| P2/45            | L-Pip                        | 698.3621                   | 698.19                     |
| P2/46            | L-Tic                        | 746.3621                   | 746.20                     |

|       |                             |          |        |
|-------|-----------------------------|----------|--------|
| P2/47 | Inp                         | 698.3621 | 698.20 |
| P2/48 | L-2Fal                      | 724.3413 | 724.17 |
| P2/49 | AC5C                        | 698.3621 | 698.19 |
| P2/50 | L-Dap                       | 673.3417 | 673.26 |
| P2/51 | L-Dab                       | 687.3573 | 687.26 |
| P2/52 | L-Dab(Z)                    | 821.3941 | 821.36 |
| P2/53 | L-Cit                       | 744.3788 | 744.32 |
| P2/54 | L-hCit                      | 758.3944 | 758.36 |
| P2/55 | L-Orn                       | 701.3730 | 701.29 |
| P2/56 | L-Lys(TFA)                  | 811.3709 | 811.32 |
| P2/57 | L-Lys(Ac)                   | 757.3992 | 757.28 |
| P2/58 | L-Lys(2-ClZ)                | 883.3864 | 883.28 |
| P2/59 | L-Agp                       | 715.3635 | 715.24 |
| P2/60 | L-hArg                      | 757.4104 | 757.31 |
| P2/61 | L-His(Bzl)                  | 814.3995 | 814.31 |
| P2/62 | L-His(3-Bom)                | 844.4101 | 844.34 |
| P2/63 | L-Phe(NH <sub>2</sub> )     | 749.3730 | 749.29 |
| P2/64 | L-Phe(guan)                 | 791.3948 | 791.30 |
| P2/65 | L-Trp(Me)                   | 787.3886 | 787.29 |
| P2/66 | L-Dht                       | 775.3886 | 775.30 |
| P2/67 | L-Gla                       | 760.3261 | 760.23 |
| P2/68 | L-Glu(O-Me)                 | 730.3519 | 730.25 |
| P2/69 | L-Glu(O-cHx)                | 798.4145 | 798.34 |
| P2/70 | L-Glu(O-Bzl)                | 806.3832 | 806.32 |
| P2/71 | L-Glu(All)                  | 756.3676 | 756.31 |
| P2/72 | L-Aad                       | 730.3519 | 730.28 |
| P2/73 | L-Phe(2-F)                  | 752.3527 | 752.29 |
| P2/74 | L-Phe(3-F)                  | 752.3527 | 752.28 |
| P2/75 | L-Phe(4-F)                  | 752.3527 | 752.29 |
| P2/76 | L-Phe(3,4-F <sub>2</sub> )  | 770.3432 | 770.27 |
| P2/77 | L-Phe(F <sub>5</sub> )      | 824.3150 | 824.26 |
| P2/78 | L-Phe(2-Cl)                 | 768.3231 | 768.24 |
| P2/79 | L-Phe(3-Cl)                 | 768.3231 | 768.25 |
| P2/80 | L-Phe(4-Cl)                 | 768.3231 | 768.25 |
| P2/81 | L-Phe(3,4-Cl <sub>2</sub> ) | 802.2841 | 802.31 |
| P2/82 | L-Phe(4-Br)                 | 812.2726 | 812.30 |
| P2/83 | L-Phe(3-I)                  | 860.2587 | 860.31 |
| P2/84 | L-Phe(4-I)                  | 860.2587 | 860.31 |
| P2/85 | L-Phe(4-Me)                 | 748.3777 | 748.40 |
| P2/86 | L-Phe(4-NO <sub>2</sub> )   | 779.3472 | 779.37 |
| P2/87 | L-3-Pal                     | 735.3573 | 735.35 |
| P2/88 | L-4-Pal                     | 735.3573 | 735.34 |
| P2/89 | L-Ala(2-th)                 | 740.3185 | 740.30 |
| P2/90 | L-Ala(Bth)                  | 791.3294 | 791.35 |
| P2/91 | Aib                         | 672.3464 | 672.30 |
| P2/92 | L-Bta                       | 790.3342 | 790.38 |
| P2/93 | L-Abu                       | 672.3464 | 672.32 |
| P2/94 | L-Abu(Bth)                  | 805.3451 | 805.41 |

|        |                                 |          |        |
|--------|---------------------------------|----------|--------|
| P2/95  | L-Ser(Bzl)                      | 764.3276 | 764.40 |
| P2/96  | L-hSer                          | 688.3413 | 688.31 |
| P2/97  | L-hSer(Bzl)                     | 778.3883 | 778.42 |
| P2/98  | L-Thr(Bzl)                      | 778.3883 | 778.43 |
| P2/99  | L-Cys(Bzl)                      | 780.3498 | 780.38 |
| P2/100 | L-Cys(MeBzl)                    | 794.3655 | 794.38 |
| P2/101 | L-Cys(4-MeOBzl)                 | 810.3604 | 810.33 |
| P2/102 | L-Met                           | 718.3342 | 718.27 |
| P2/103 | L-Met(O)                        | 734.3291 | 734.29 |
| P2/104 | L-Met(O) <sub>2</sub>           | 750.3240 | 750.29 |
| P2/105 | L-Nle(O-Bzl)                    | 806.4196 | 806.40 |
| P2/106 | L-Phg                           | 720.3464 | 720.34 |
| P2/107 | L-hPhe                          | 748.3777 | 748.39 |
| P2/108 | L-Chg                           | 726.3934 | 726.39 |
| P2/109 | L-Cha                           | 740.4090 | 740.41 |
| P2/110 | L-hCha                          | 754.4247 | 754.44 |
| P2/111 | L-Igl                           | 760.3777 | 760.39 |
| P2/112 | L-1-Nal                         | 784.3777 | 784.42 |
| P2/113 | L-2-Nal                         | 784.3777 | 784.42 |
| P2/114 | L-Bip                           | 810.3934 | 810.44 |
| P2/115 | L-Bpa                           | 838.3883 | 838.44 |
| P2/116 | L-2-Aoc                         | 728.4090 | 728.40 |
| P2/117 | L-Arg(NO <sub>2</sub> )         | 788.3799 | 788.40 |
| P2/118 | L-hLeu                          | 714.3934 | 714.37 |
| P2/119 | L-Tle                           | 700.3777 | 700.36 |
| P2/120 | L-Tyr(Me)                       | 764.3726 | 764.43 |
| P2/121 | L-Tyr(2,6-Cl <sub>2</sub> -Bzl) | 908.3260 | 908.41 |
| P2/122 | L-Tyr(Bzl)                      | 840.4039 | 840.48 |
| P2/123 | L-hTyr                          | 764.3726 | 764.41 |
| P2/124 | L-hTyr(Me)                      | 778.3883 | 778.43 |
| P2/125 | L-Nva                           | 686.3621 | 686.33 |
| P2/126 | 2-Abz                           | 706.3308 | 706.33 |
| P2/127 | 3-Abz                           | 706.3308 | 706.31 |
| P2/128 | 4-Abz                           | 706.3308 | 706.30 |

**Table S2.** Structures of fixed natural and unnatural amino acids used in combinatorial library.

| No | Structure + code                                                                          | No | Structure + code                                                                          | No | Structure + code                                                                            |
|----|-------------------------------------------------------------------------------------------|----|-------------------------------------------------------------------------------------------|----|---------------------------------------------------------------------------------------------|
| 1  | 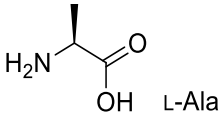 L-Ala   | 2  |  L-Arg   | 3  |  L-Asn   |
| 4  |  L-Asp   | 5  |  L-Gln   | 6  |  L-Glu   |
| 7  |  Gly     | 8  |  L-His  | 9  |  L-Ile  |
| 10 |  L-Leu | 11 |  L-Lys | 12 |  L-Nle |
| 13 |  L-Phe | 14 |  L-Pro | 15 |  L-Ser |
| 16 |  L-Thr | 17 |  L-Trp | 18 |  L-Tyr |



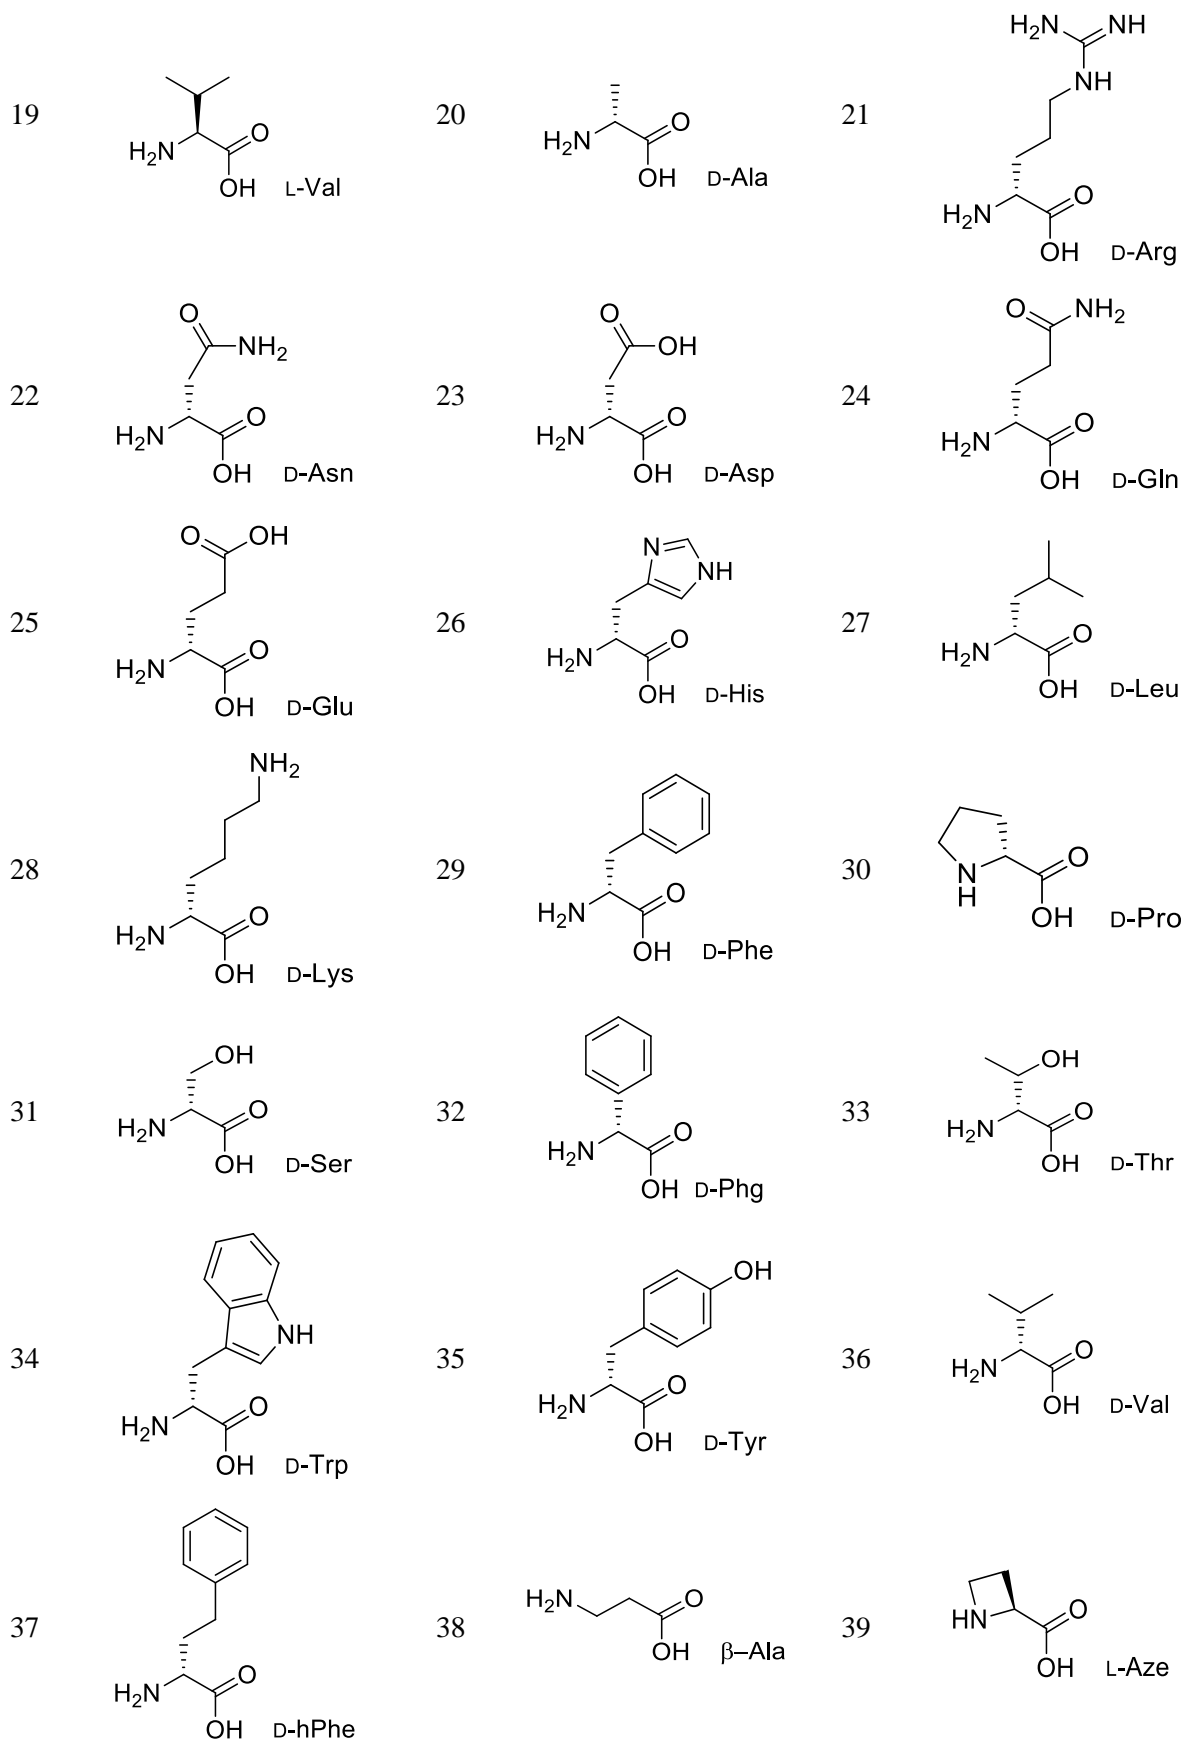

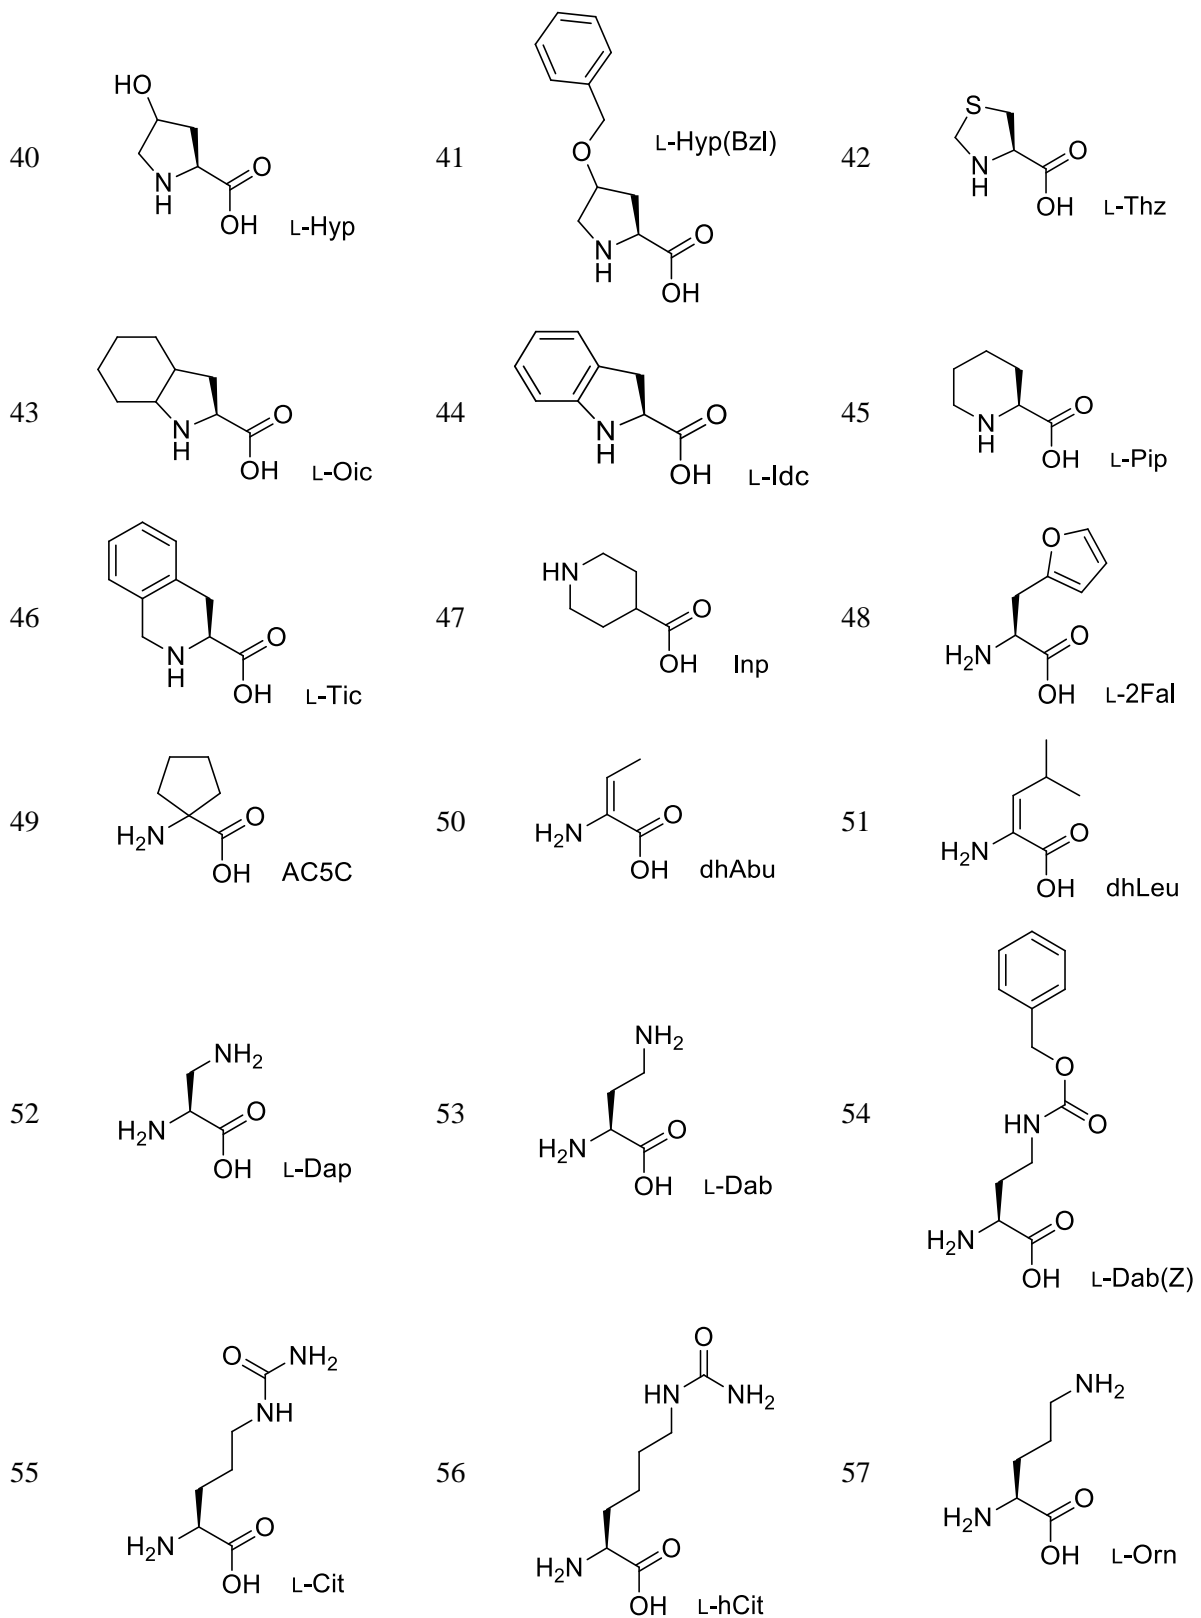

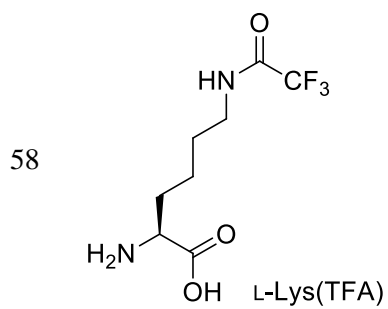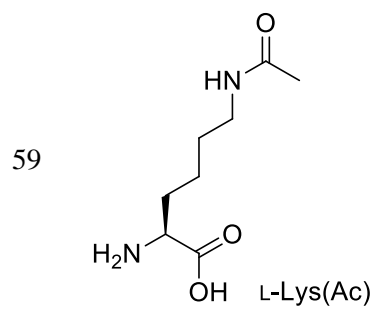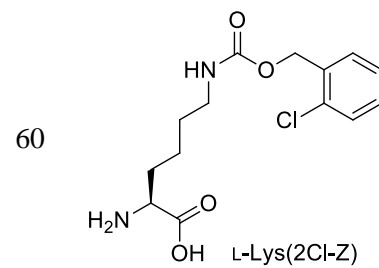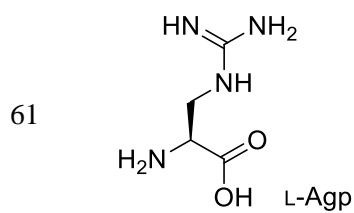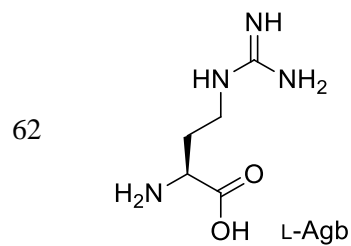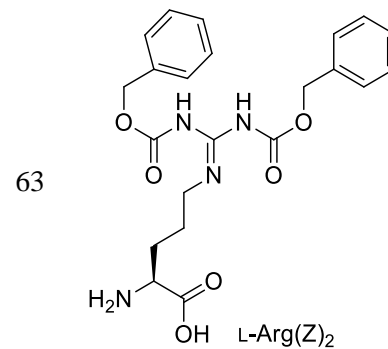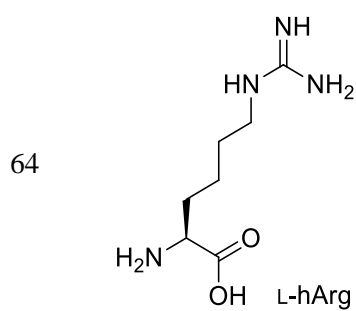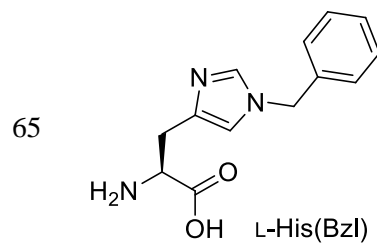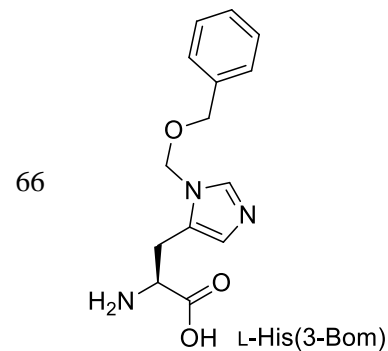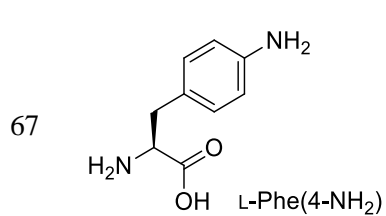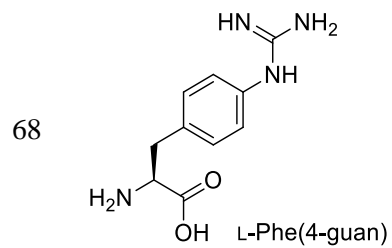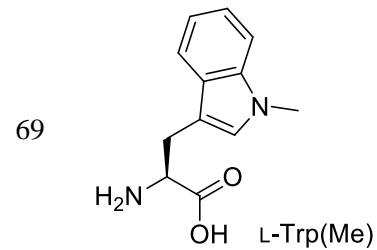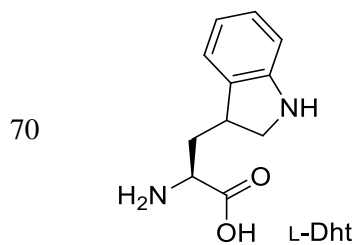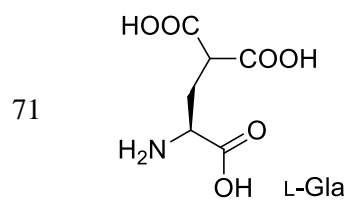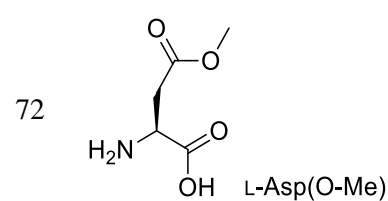

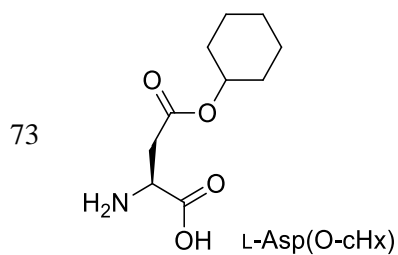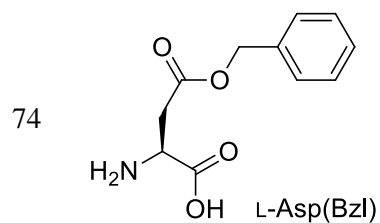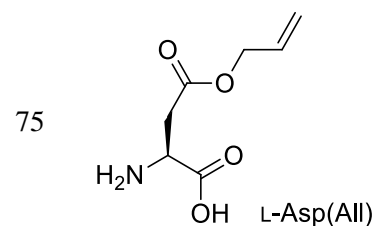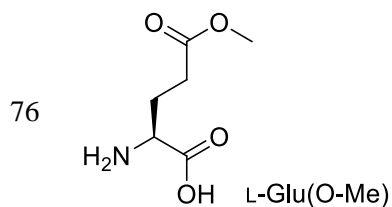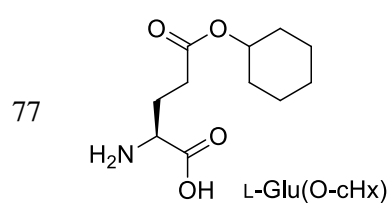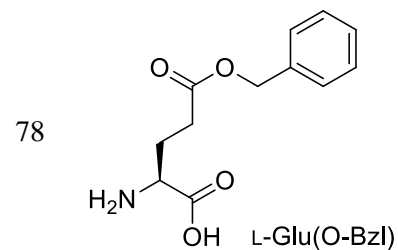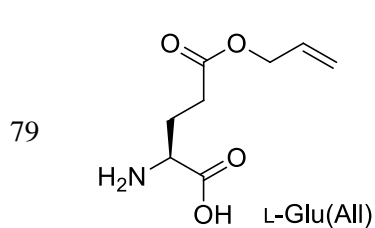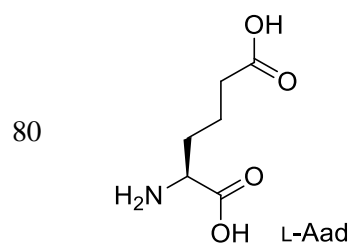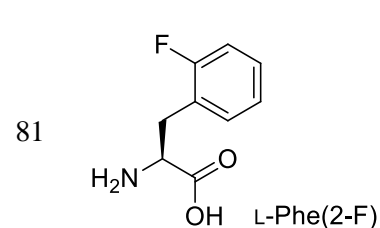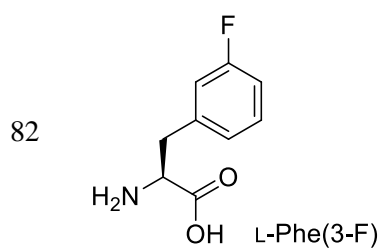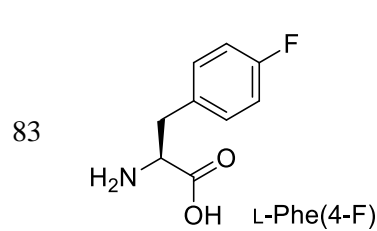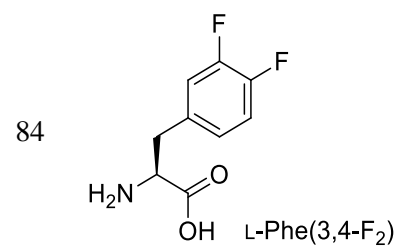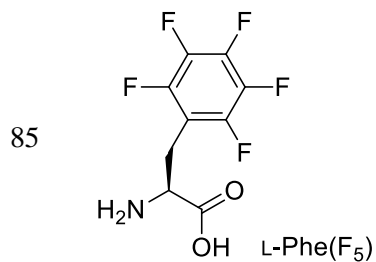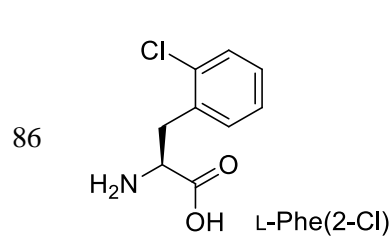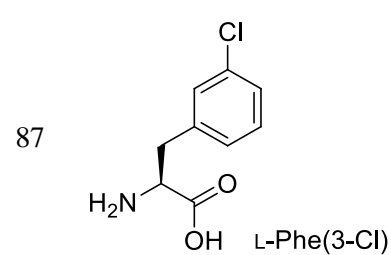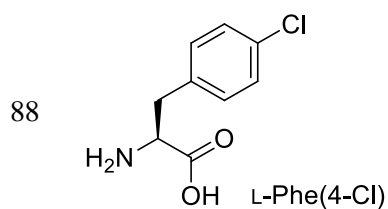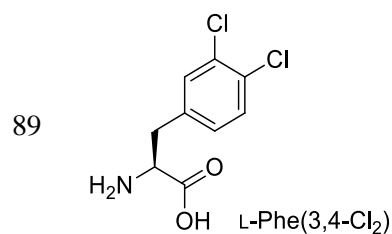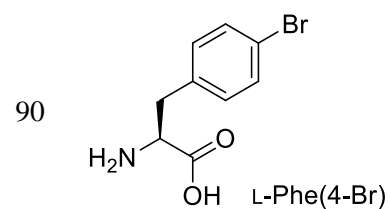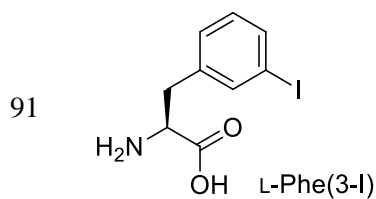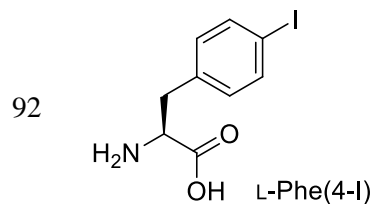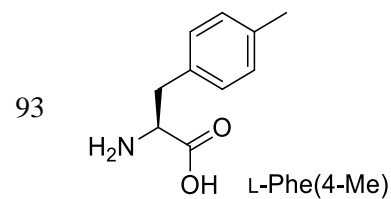

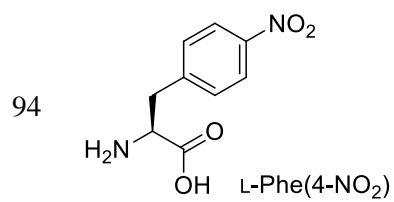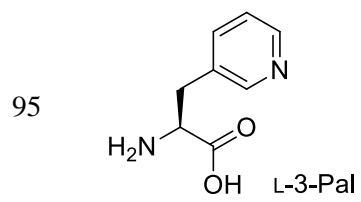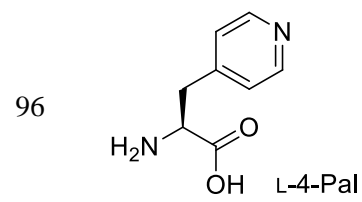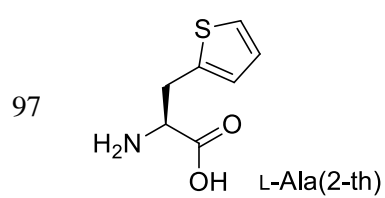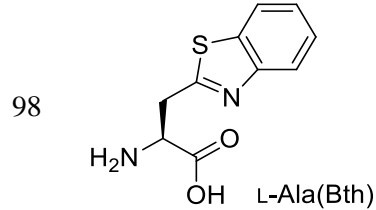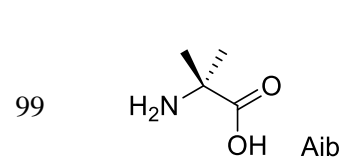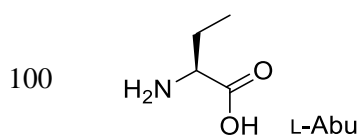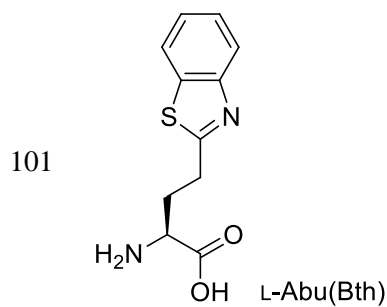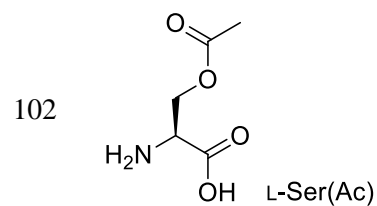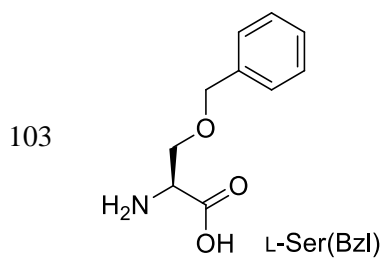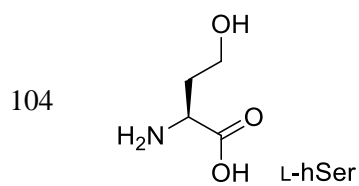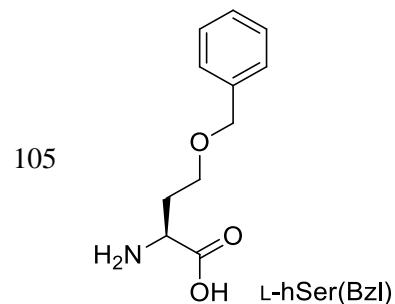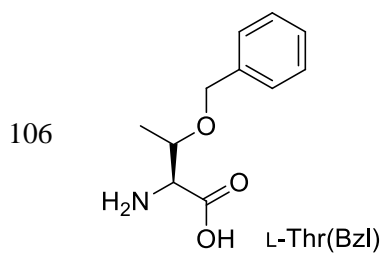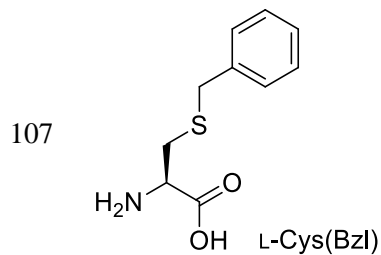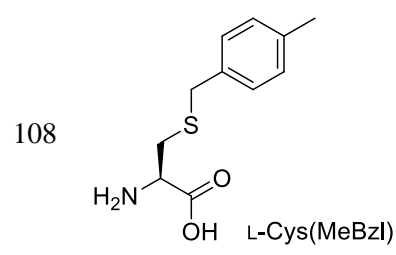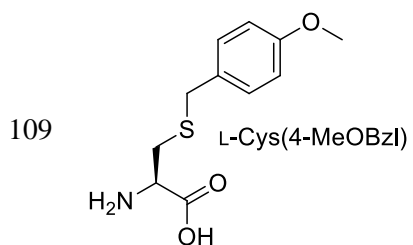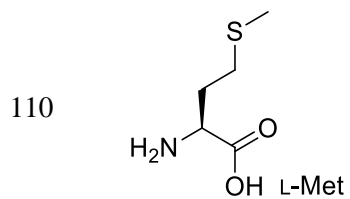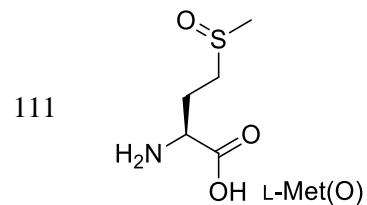

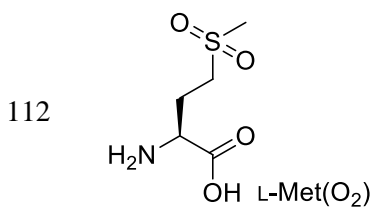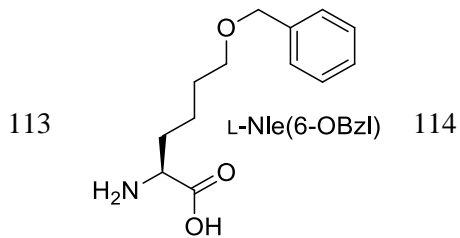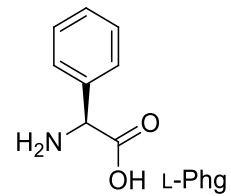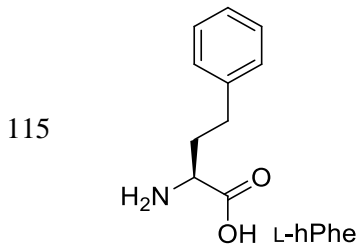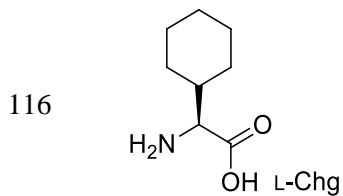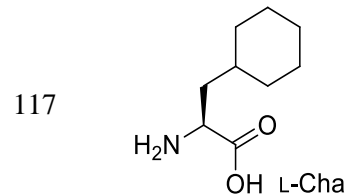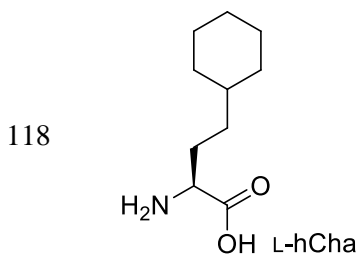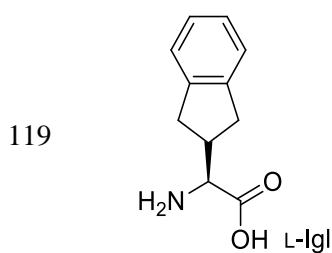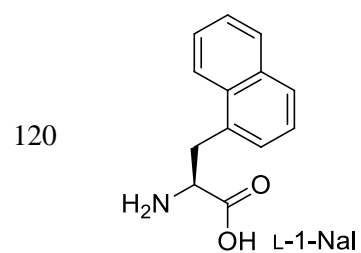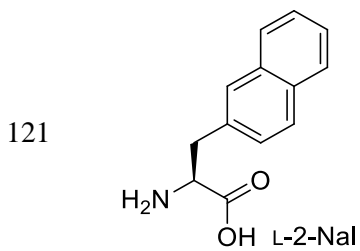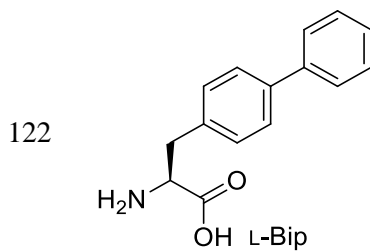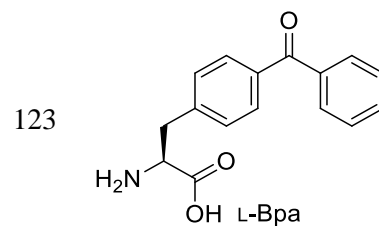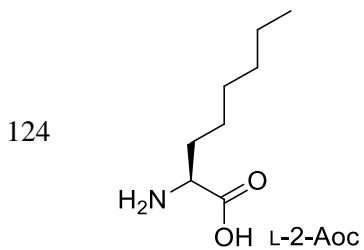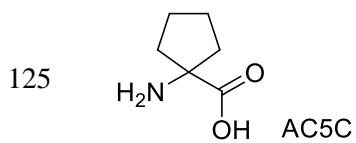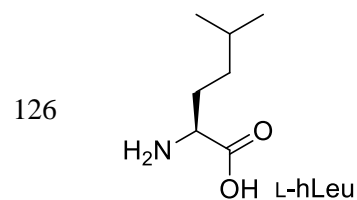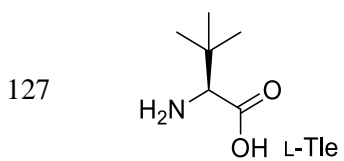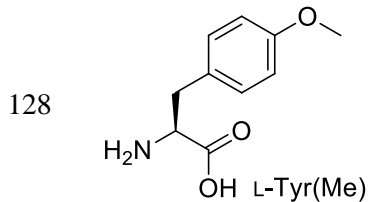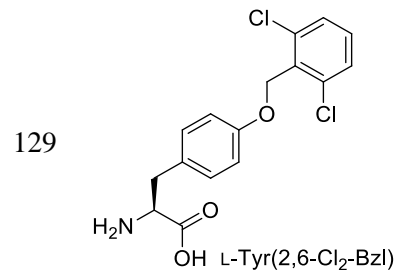

130

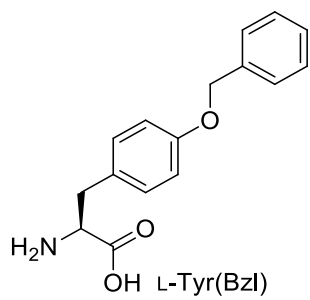

131

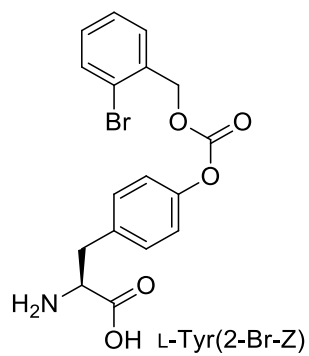

132

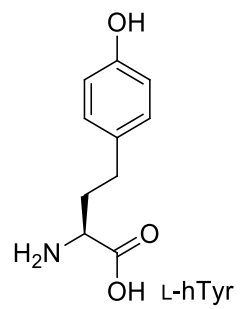

133

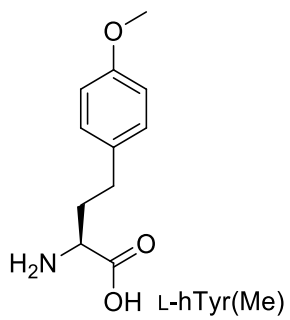

134

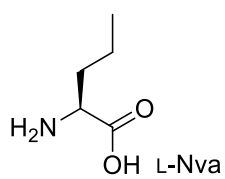

135

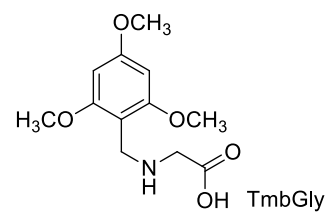

136

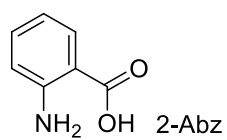

137

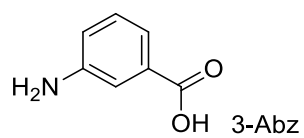

138

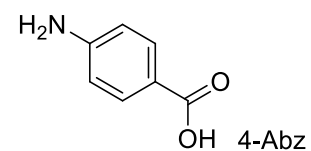

## HRMS and analytical chromatograms of synthesized substrates and activity-based probes

### Ac-Leu-Arg-Gly-Gly-ACC

HRMS for  $C_{29}H_{41}N_9O_8$  ( $m/z$  calcd = 644.3151;  $m/z$  found = 644.3158)

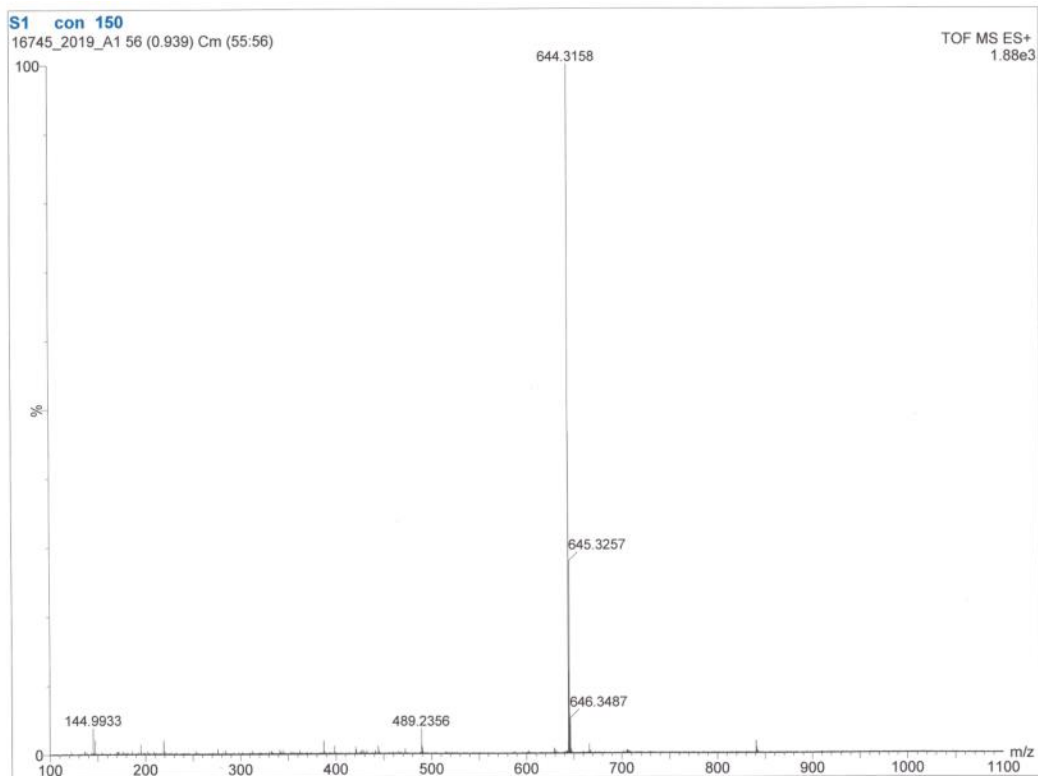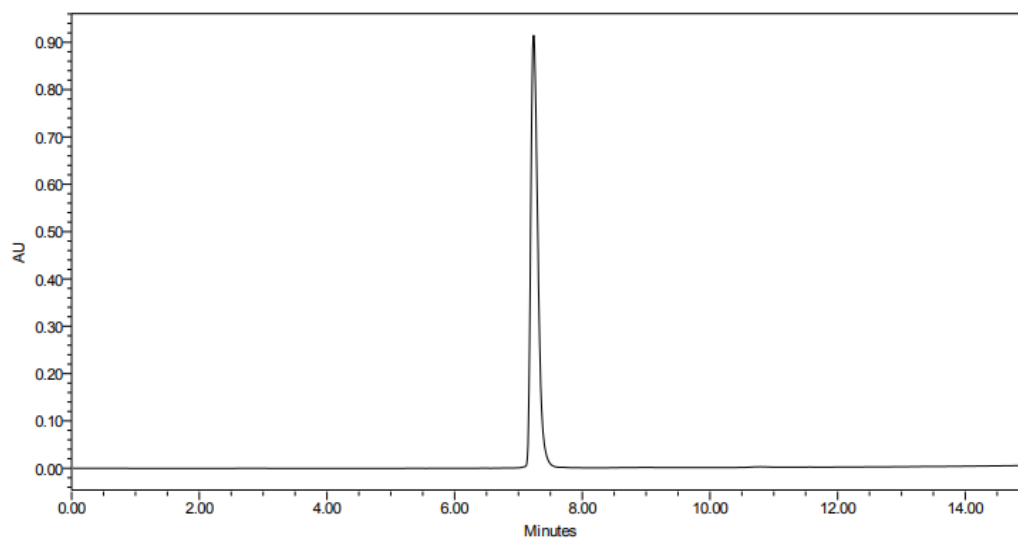



# Ac-Tle-Phg-Gly-Gly-ACC

HRMS for  $C_{31}H_{36}N_6O_8$  ( $m/z$   $_{\text{calcd}} = 621.2595$ ;  $m/z$   $_{\text{found}} = 621.2672$ )

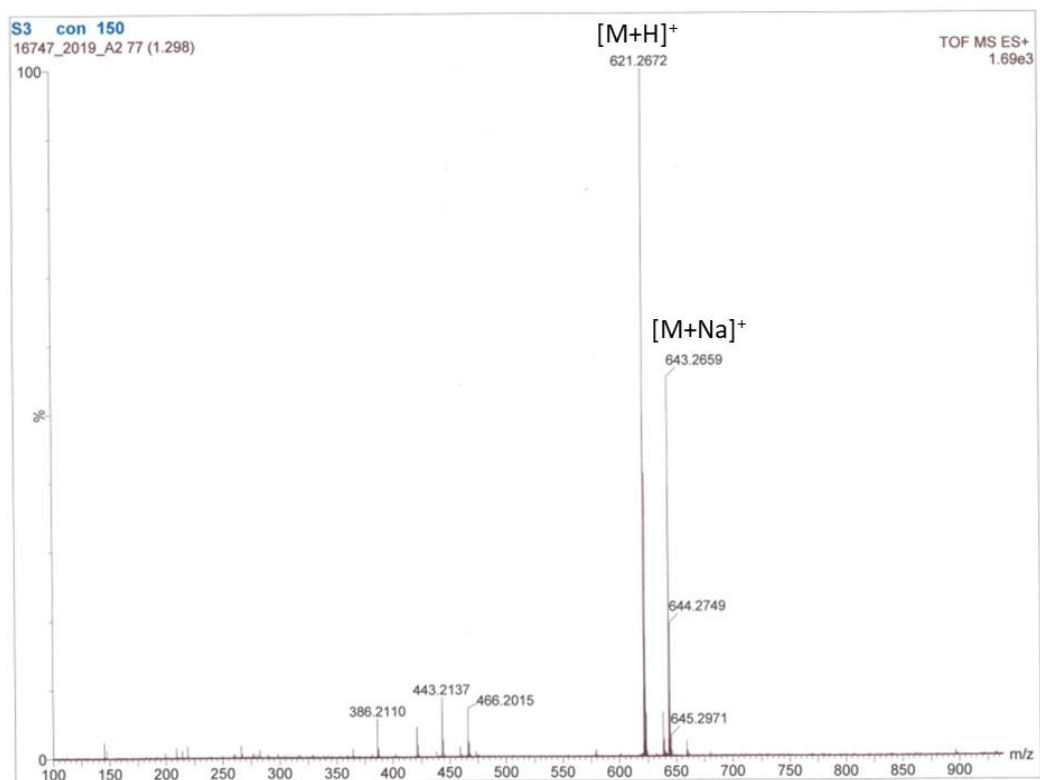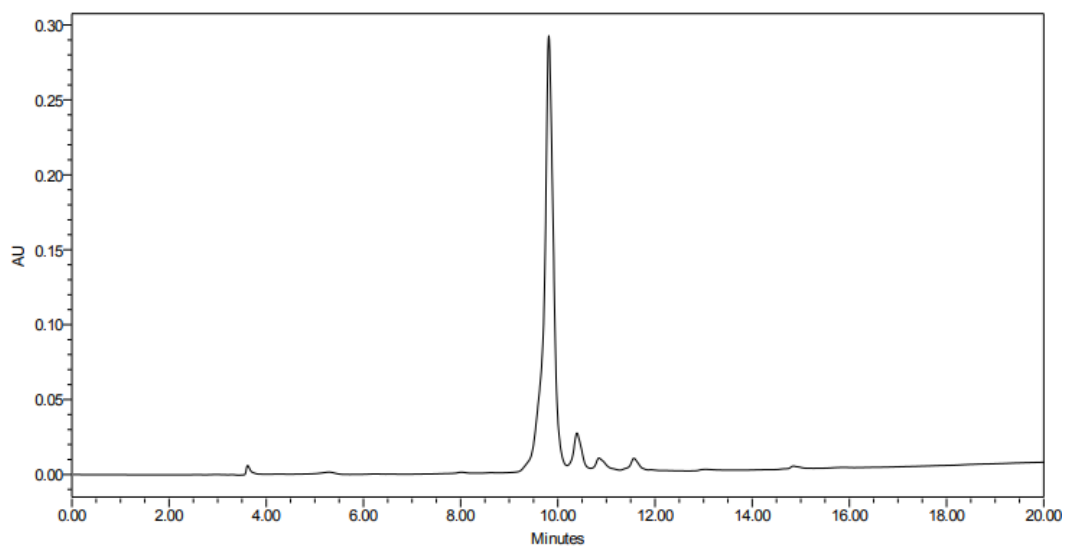

### Ac-Cha-Arg-Abu-Gly-ACC

HRMS for  $C_{34}H_{49}N_9O_8$  ( $m/z$   $_{\text{calcd}} = 712.3777$ ;  $m/z$   $_{\text{found}} = 712.3780$ )

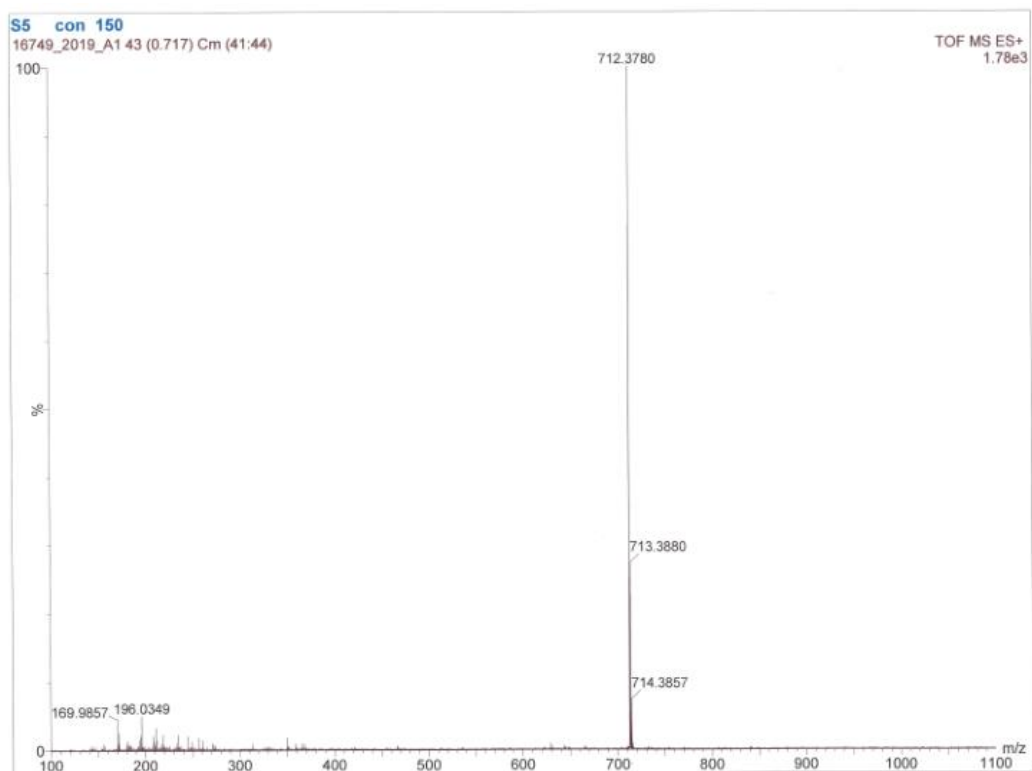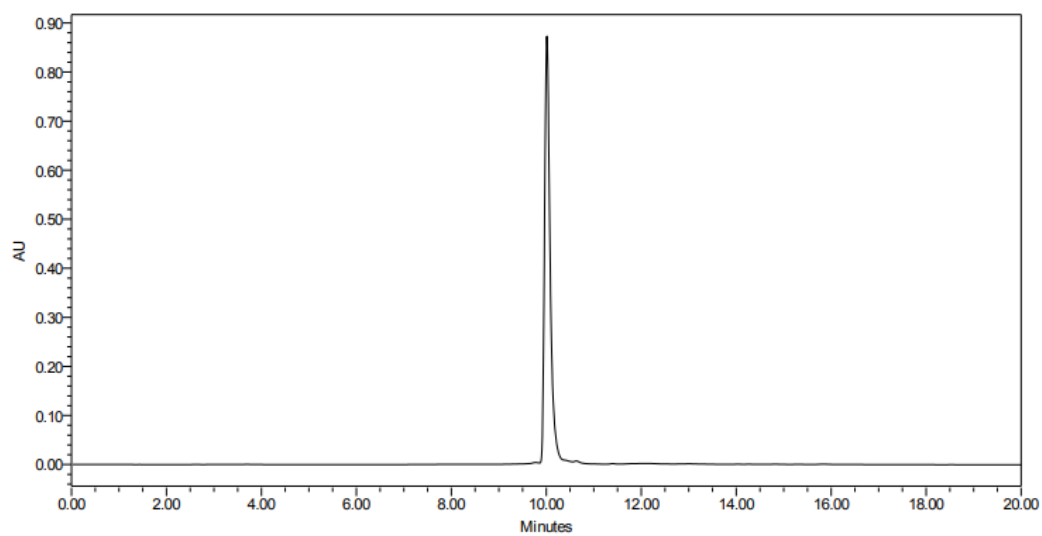

# Ac-DArg-Phe(guan)-Ala-Gly-ACC

HRMS for  $C_{34}H_{44}N_{12}O_8$  ( $m/z_{\text{calcd}} = 749.3478$ ;  $m/z_{\text{found}} = 749.3479$ )

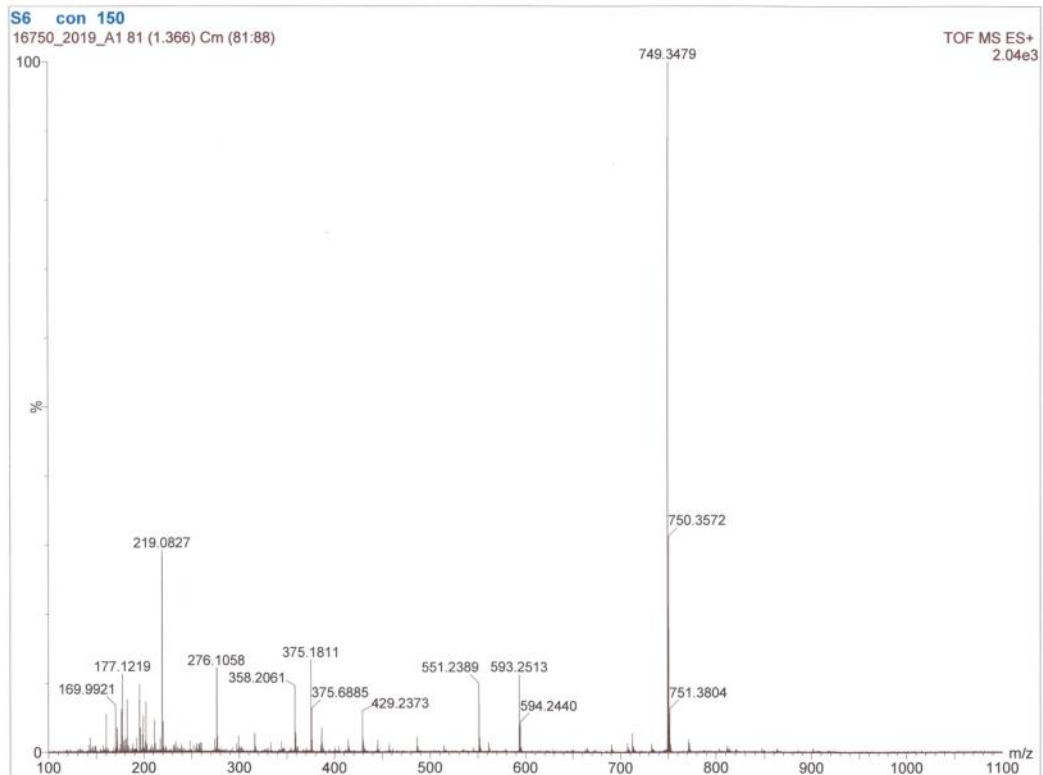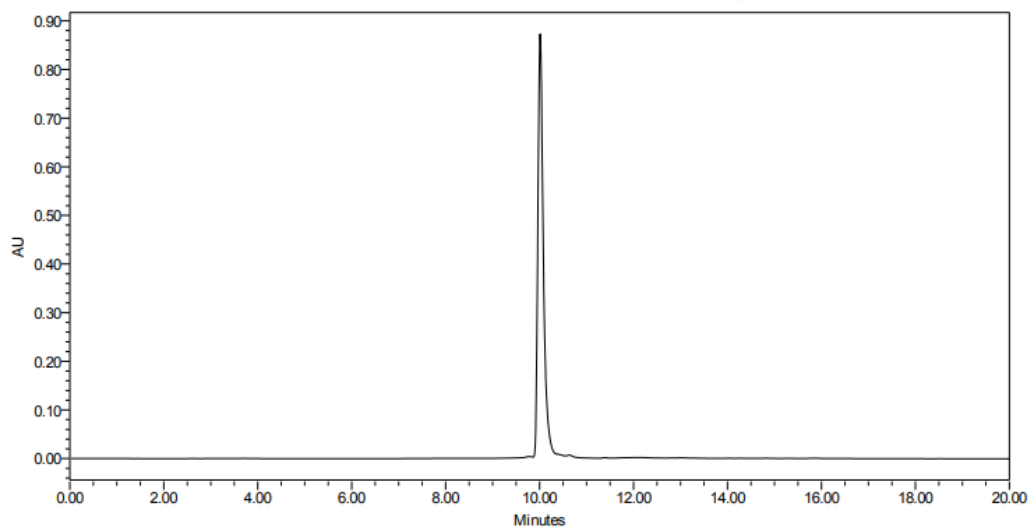

# Ac-Cys(4-MeOBzl)-Phg-Gly-Gly-ACC

HRMS for  $C_{36}H_{38}N_6O_9S$  ( $m/z$  calcd = 731.2494;  $m/z$  found = 731.2478)

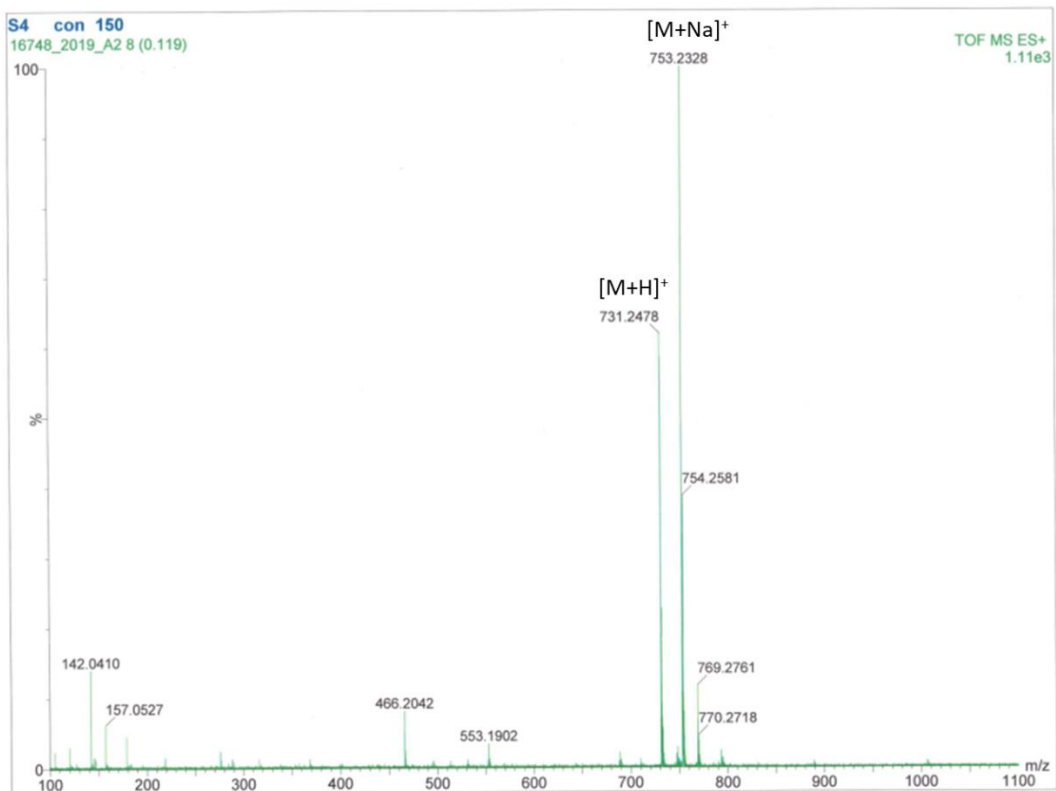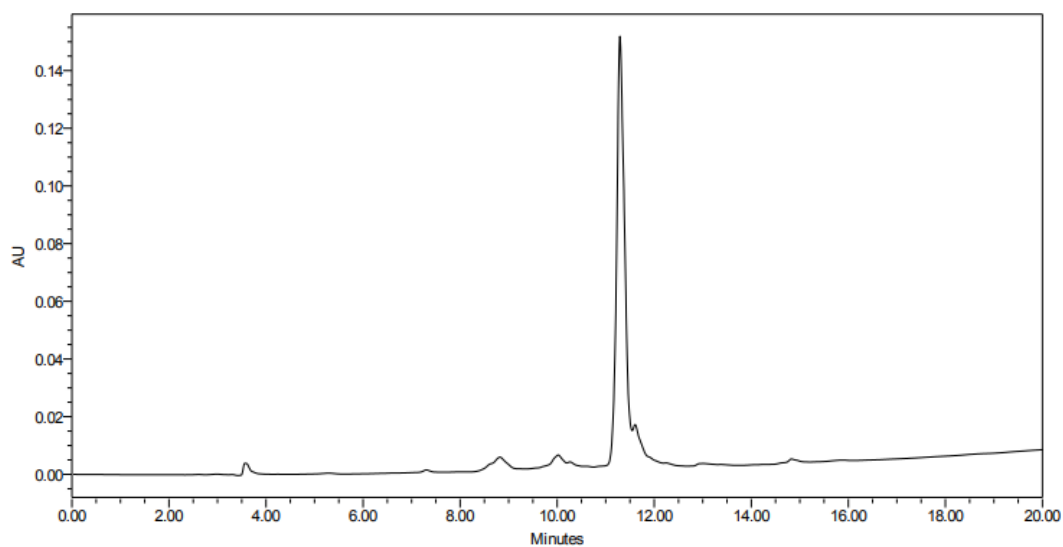

# Ac-Cys(MeBzl)-Phg-Gly-Gly-ACC

HRMS for  $C_{36}H_{38}N_6O_8S$  ( $m/z$  calcd = 715.2545;  $m/z$  found = 715.2556)

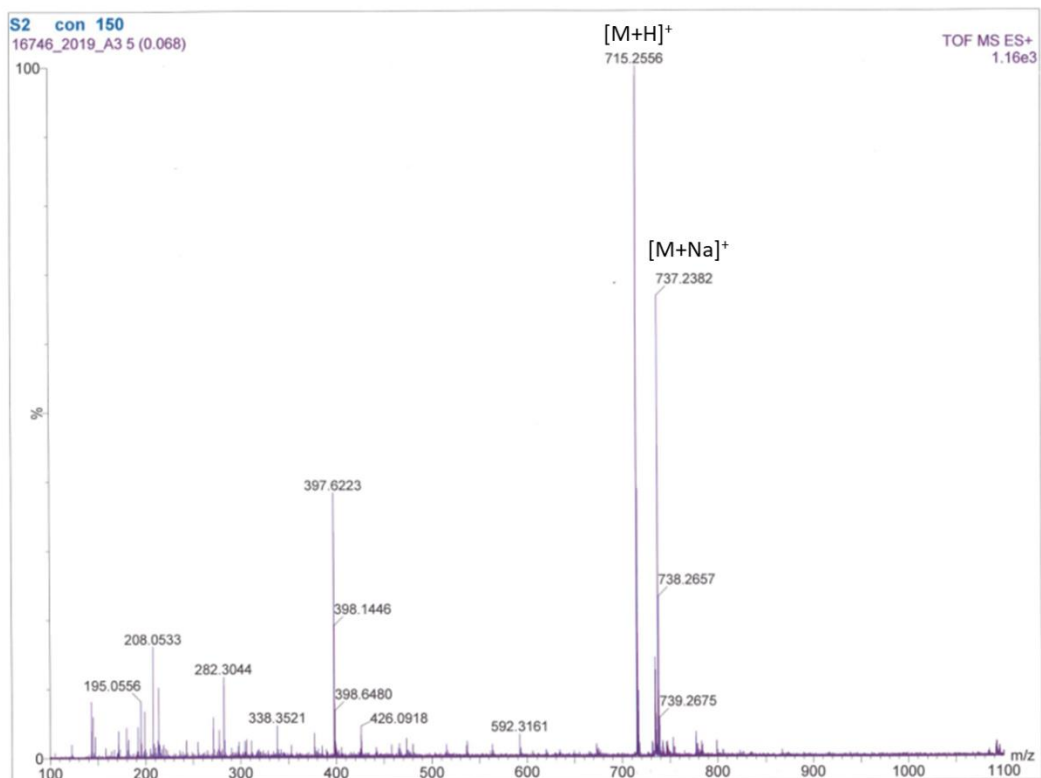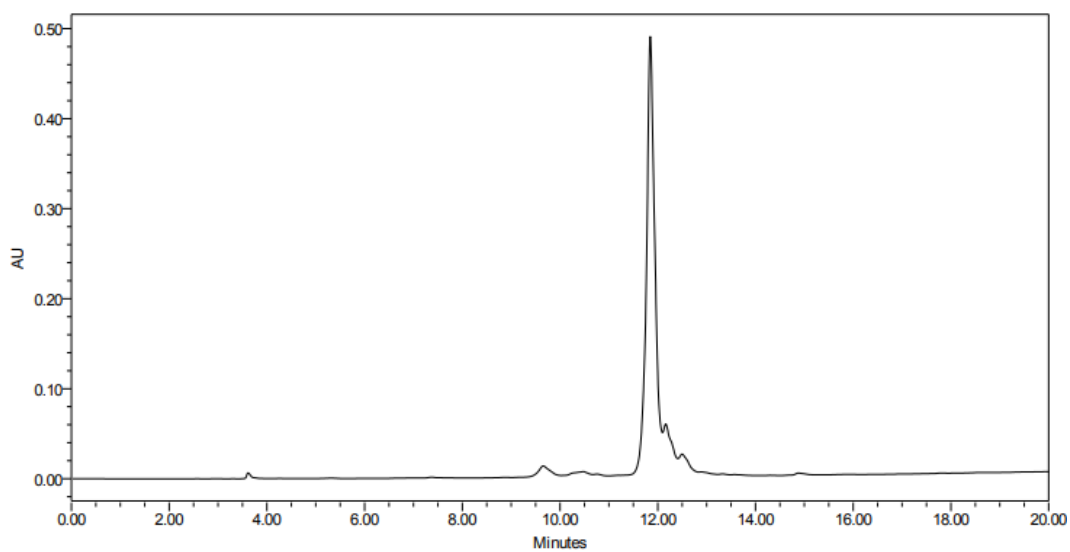

# Ub-ACC

HRMS for C<sub>389</sub>H<sub>637</sub>N<sub>107</sub>O<sub>120</sub>S

| charge | m/z <sub>calcd</sub> | m/z <sub>found</sub> |
|--------|----------------------|----------------------|
| +6     | 1461.6221            | 1461.8839            |
| +7     | 1252.9628            | 1253.2618            |
| +8     | 1096.4684            | 1096.7080            |
| +9     | 974.7505             | 974.9593             |
| +10    | 877.3762             | 877.6428             |
| +11    | 797.7063             | 797.8460             |

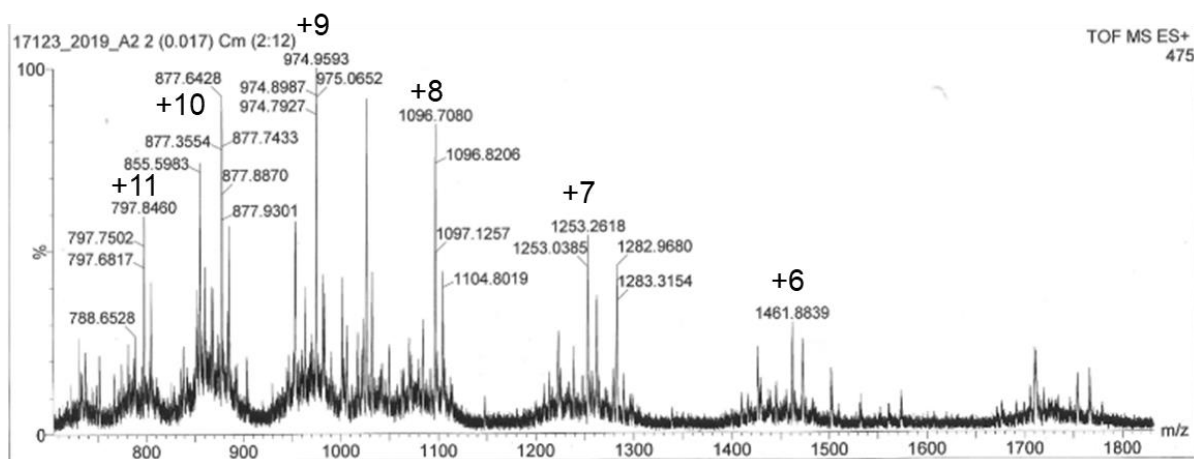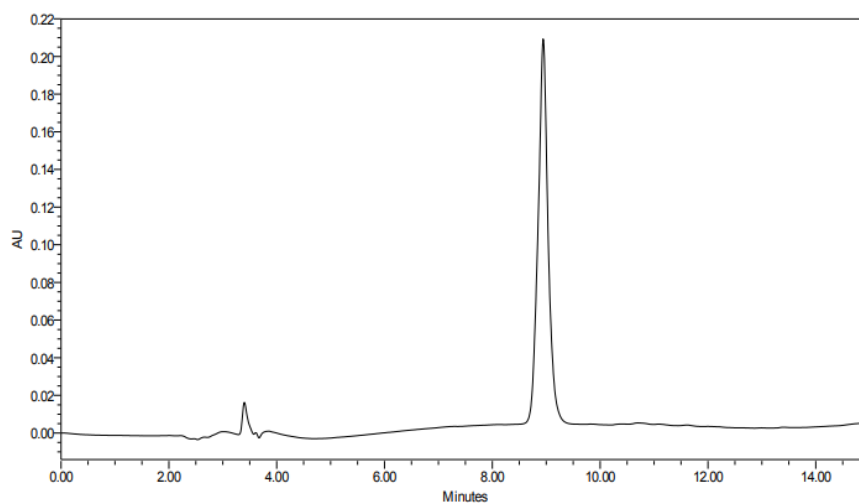

## Ub-Tle-Phg-Gly-Gly-ACC (Ub-MERS27-ACC)

HRMS for C<sub>391</sub>H<sub>632</sub>N<sub>104</sub>O<sub>120</sub>S

| charge | m/z <sub>calcd</sub> | m/z <sub>found</sub> |
|--------|----------------------|----------------------|
| +5     | 1749.1354            | 1749.5309            |
| +6     | 1457.7807            | 1457.9774            |
| +7     | 1249.6702            | 1249.8422            |
| +8     | 1093.5874            | 1093.7565            |
| +9     | 972.1896             | 972.3176             |
| +10    | 875.0713             | 875.1980             |

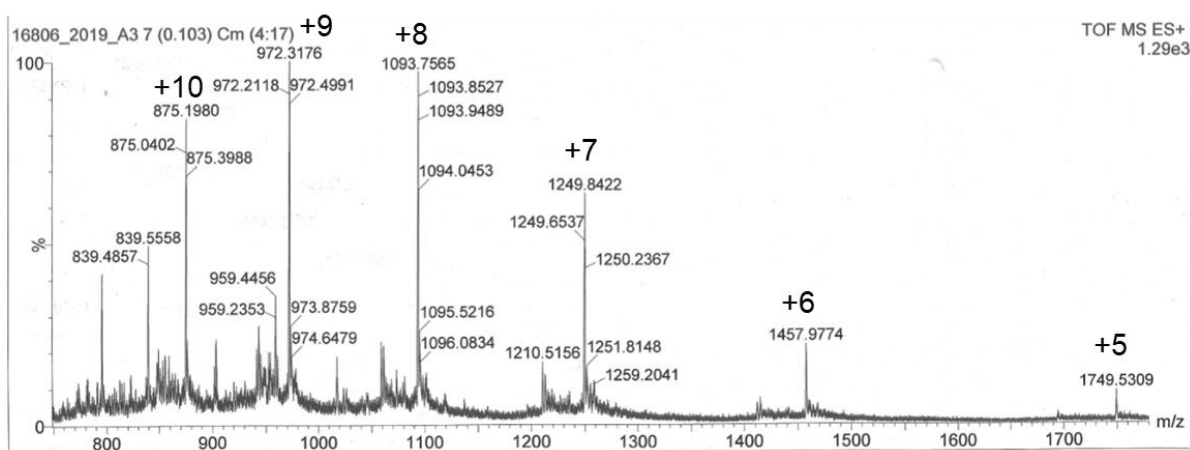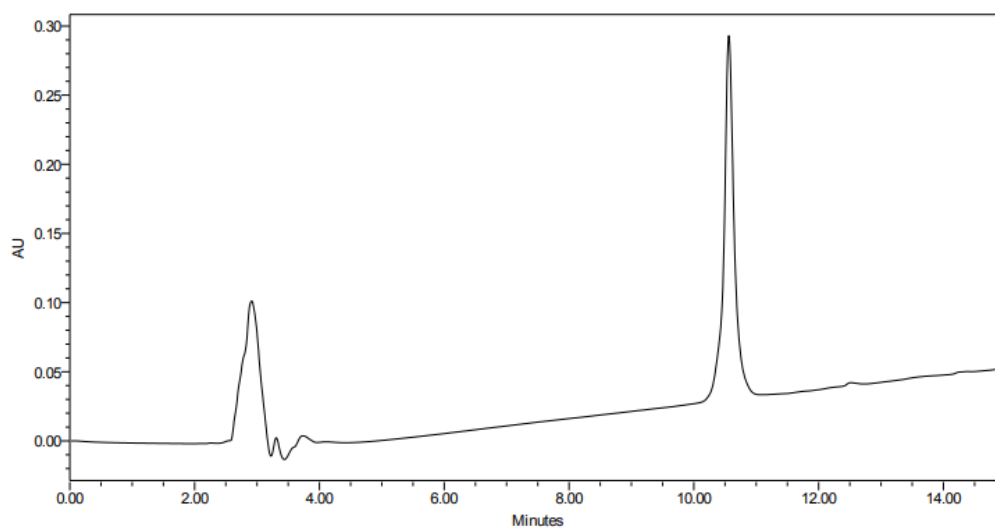

# Ub-Cha-Arg-Abu-Gly-ACC (Ub-UCHL3-1-ACC)

HRMS for C<sub>394</sub>H<sub>645</sub>N<sub>107</sub>O<sub>120</sub>S

| charge | m/z <sub>calcd</sub> | m/z <sub>found</sub> |
|--------|----------------------|----------------------|
| +5     | 1767.3576            | 1767.8867            |
| +6     | 1472.9659            | 1473.3879            |
| +7     | 1262.6861            | 1263.0165            |
| +8     | 1104.9762            | 1105.1364            |
| +9     | 982.3130             | 982.4749             |
| +10    | 884.1824             | 884.3774             |
| +11    | 803.8938             | 804.0812             |
| +12    | 736.9866             | 737.1602             |

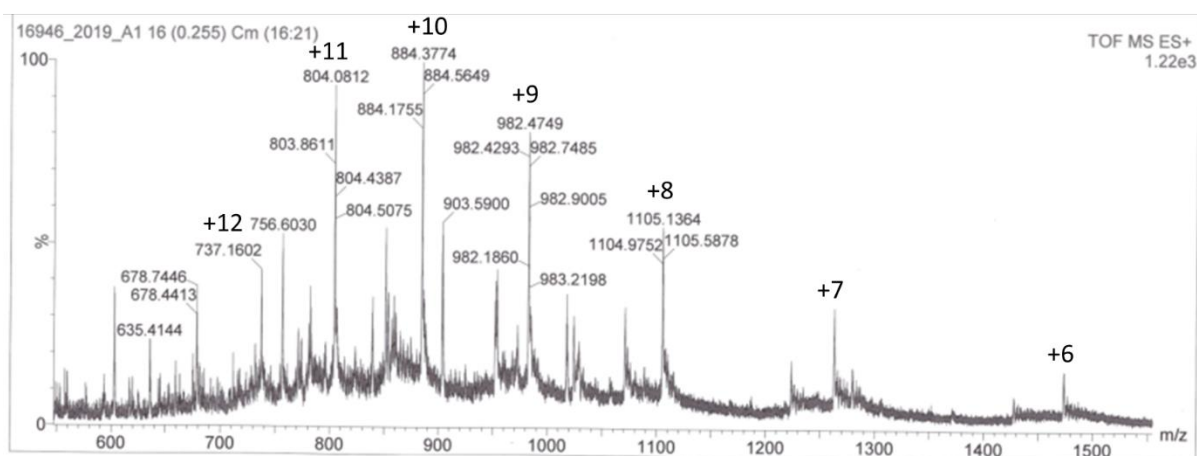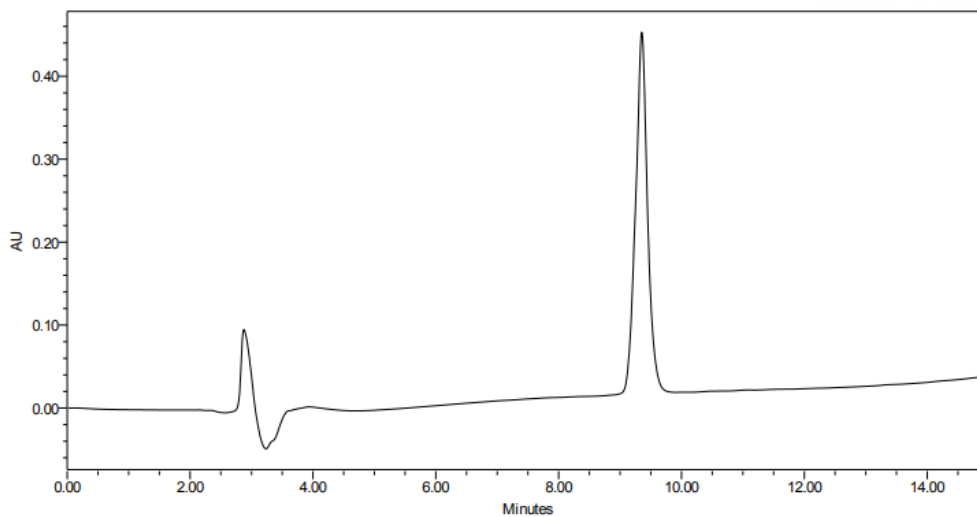



# Ub-DArg-Phe(guan)-Ala-Gly-ACC (Ub-UCHL3-2-ACC)

HRMS for C<sub>394</sub>H<sub>640</sub>N<sub>110</sub>O<sub>120</sub>S

| charge | m/z calcd | m/z found |
|--------|-----------|-----------|
| +4     | 2218.1876 | 2218.8503 |
| +5     | 1774.7516 | 1775.1068 |
| +6     | 1479.1275 | 1479.4045 |
| +7     | 1267.9675 | 1268.1271 |
| +8     | 1109.5975 | 1109.8116 |

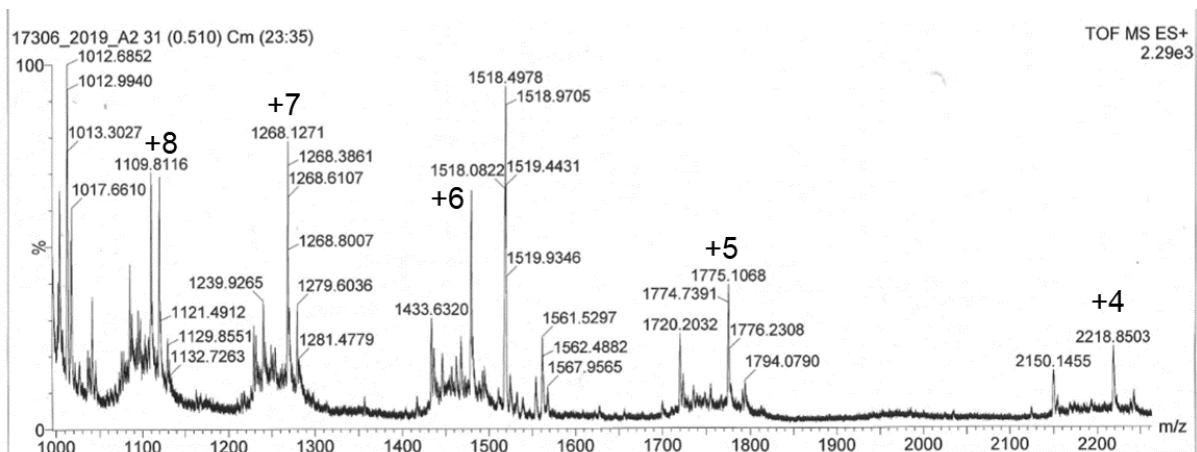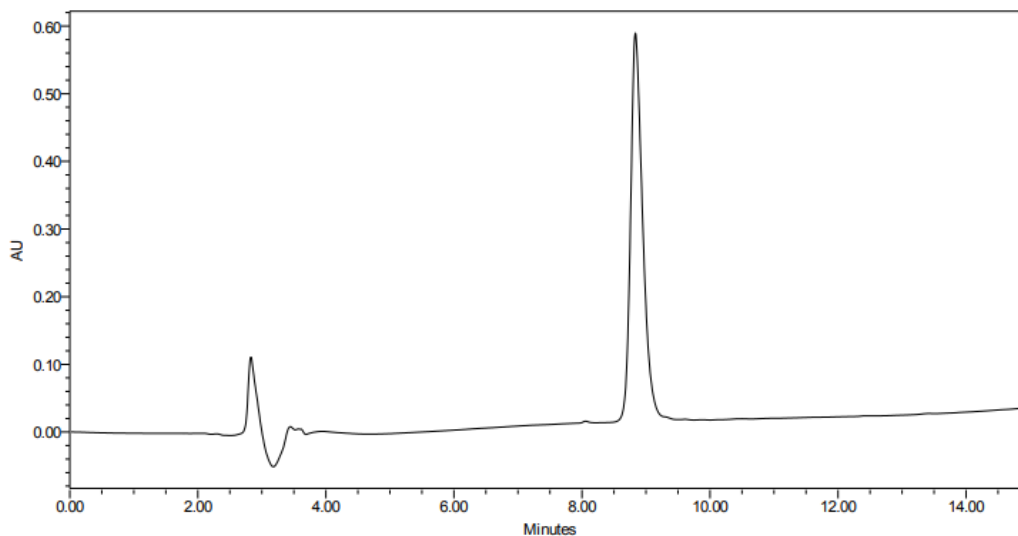

### Biot-6-Ahx-Ub-VME (B-Ub-VME)

HRMS for  $C_{397}H_{658}N_{108}O_{121}S_2$

| charge | m/z calcd | m/z found |
|--------|-----------|-----------|
| +6     | 1491.4778 | 1491.8063 |
| +7     | 1278.5535 | 1278.8268 |
| +8     | 1118.8602 | 1119.2485 |
| +9     | 994.6543  | 994.8820  |
| +10    | 895.2896  | 895.3971  |
| +11    | 813.9912  | 814.0791  |
| +12    | 746.2426  | 746.3508  |

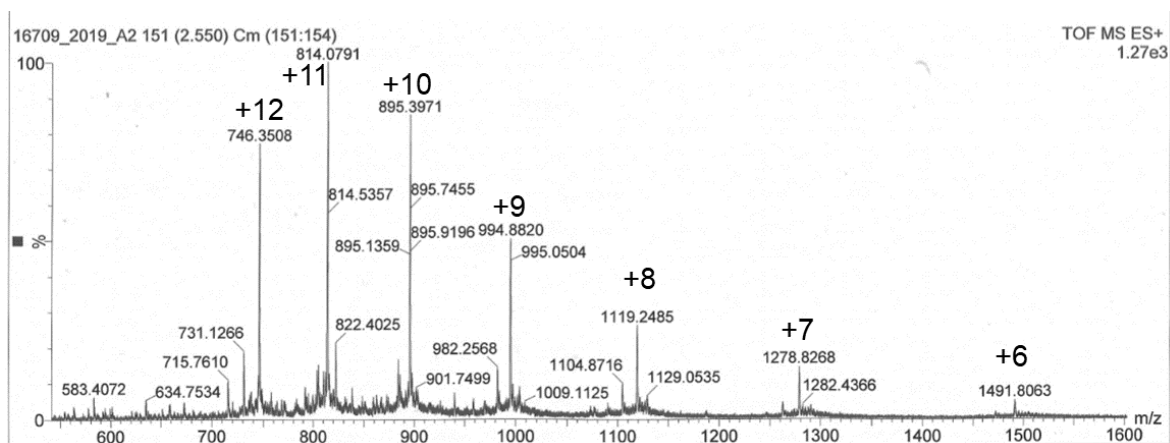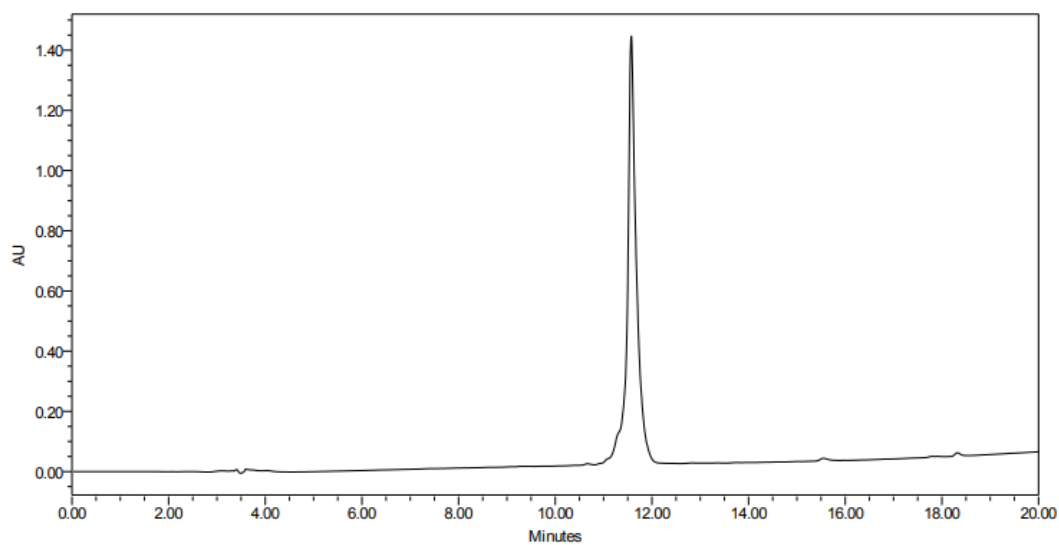

### Biot-6-Ahx-Ub-Tle-Phg-Gly-Gly-VME (B-Ub-MERS27-VME)

HRMS for C<sub>399</sub>H<sub>653</sub>N<sub>105</sub>O<sub>121</sub>S<sub>2</sub>

| charge | m/z calcd | m/z found |
|--------|-----------|-----------|
| +6     | 1487.6364 | 1487.8646 |
| +7     | 1275.2608 | 1275.4232 |
| +8     | 1115.9791 | 1116.2777 |
| +9     | 992.0934  | 992.2054  |
| +10    | 892.9848  | 893.1783  |
| +11    | 811.8959  | 812.1168  |

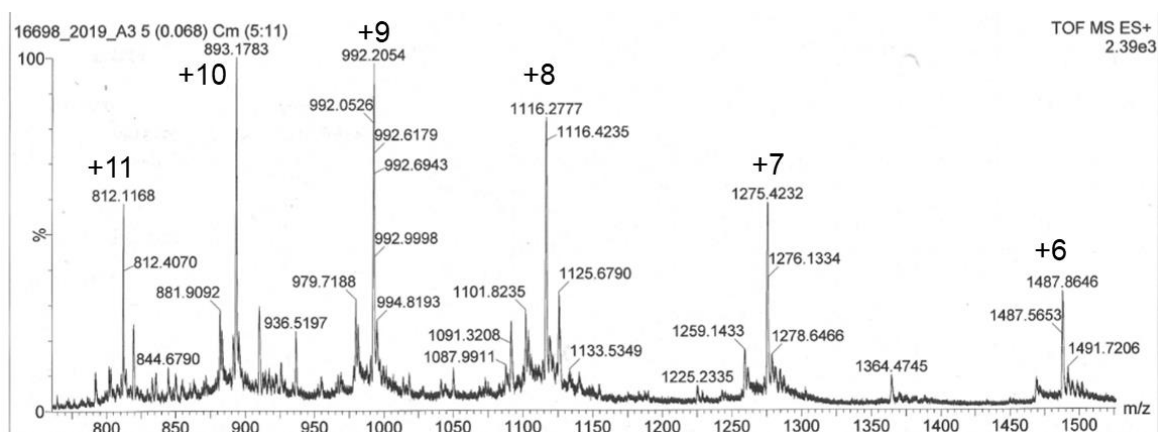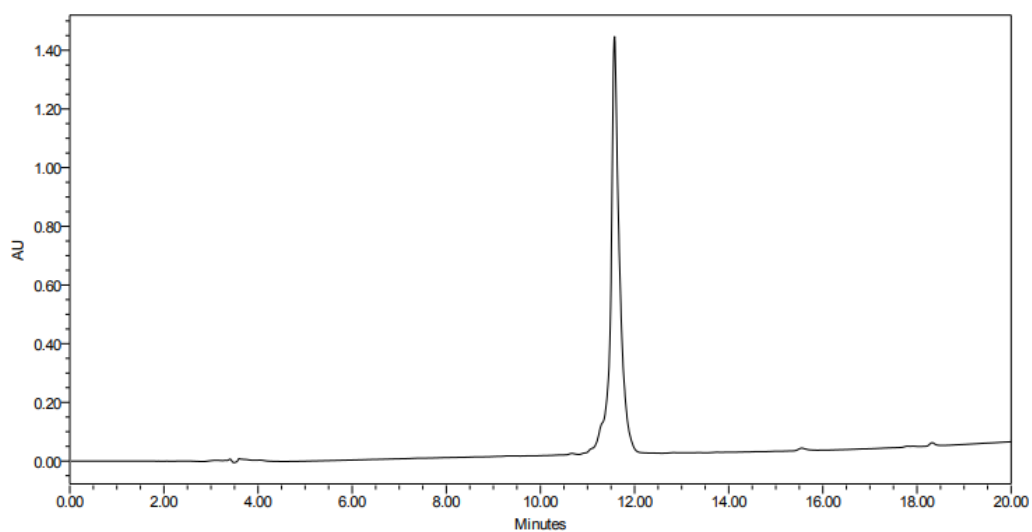

# Biot-6-Ahx-Ub-Cha-Arg-Abu-Gly-VME (B-Ub-UCHL3-1-VME)

HRMS for C<sub>402</sub>H<sub>666</sub>N<sub>108</sub>O<sub>121</sub>S<sub>2</sub>

| charge | m/z calcd | m/z found |
|--------|-----------|-----------|
| +8     | 1127.3680 | 1127.5012 |
| +9     | 1002.2168 | 1002.3268 |
| +10    | 902.0959  | 902.2721  |
| +11    | 820.1787  | 820.2746  |
| +12    | 751.9144  | 752.0181  |

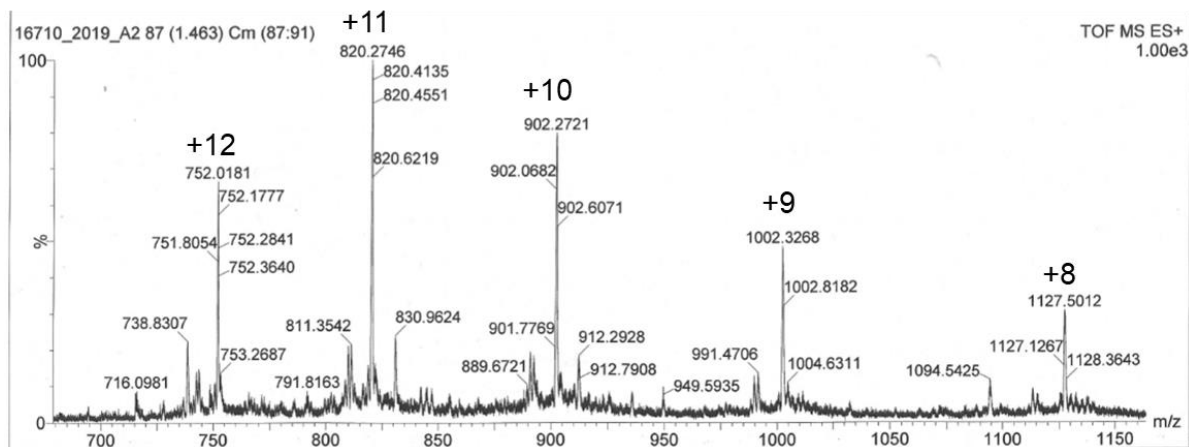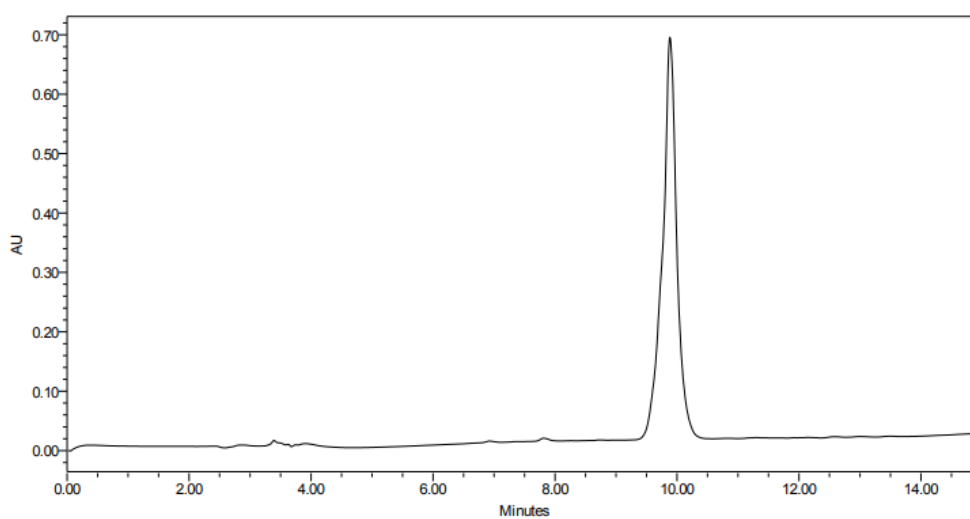

# Biot-6-Ahx-Ub-DArg-Phe(guan)-Ala-Gly-VME (B-Ub-UCHL3-2-VME)

HRMS for  $C_{402}H_{661}N_{111}O_{121}S_2$

| charge | m/z calcd | m/z found |
|--------|-----------|-----------|
| +8     | 1131.9893 | 1132.2377 |
| +9     | 1006.3246 | 1006.6258 |
| +10    | 905.7929  | 905.9586  |
| +11    | 823.5396  | 823.6242  |
| +12    | 754.9953  | 755.0801  |
| +13    | 696.9962  | 697.1877  |

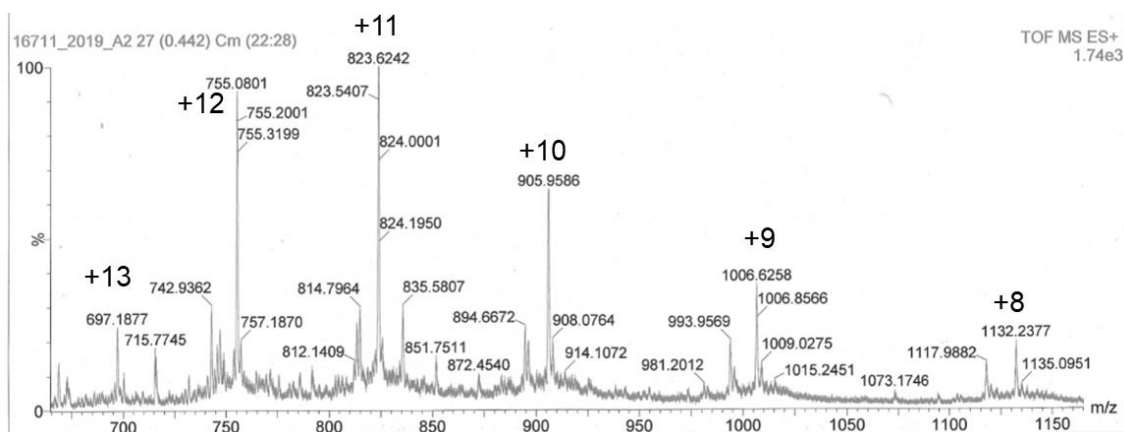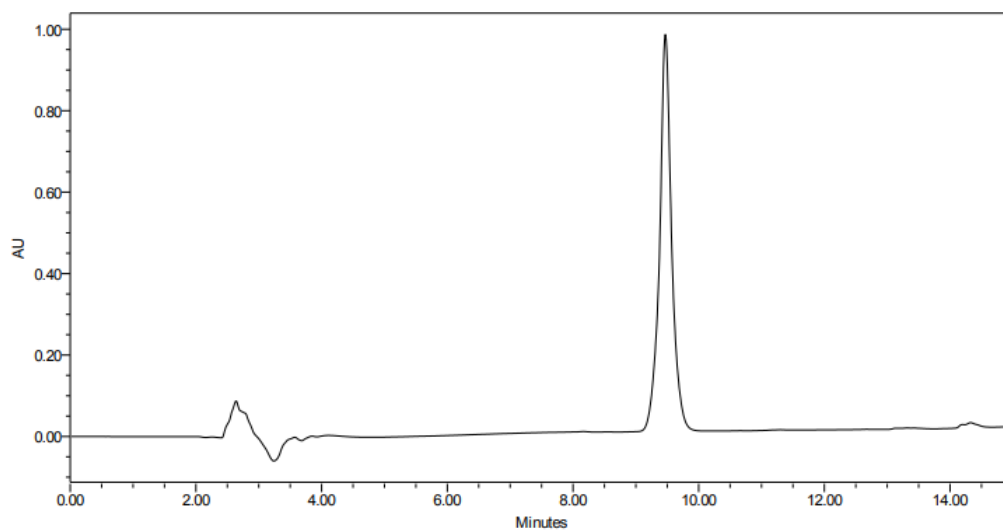



### Ub[1-45]-(A<sup>28</sup>C)-NH-NH<sub>2</sub>

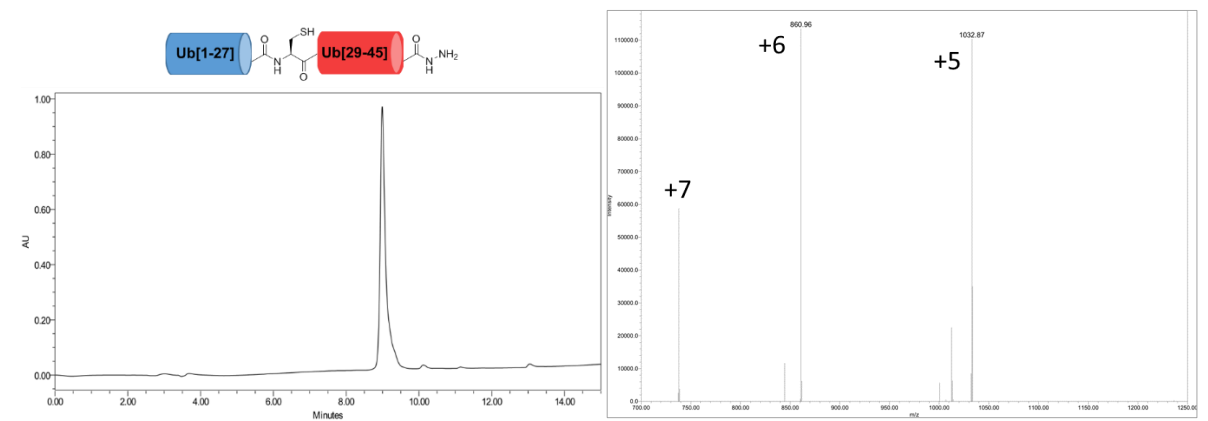

### Biot-6-Ahx-Ub[1-45]-(A<sup>28</sup>C)-NH-NH<sub>2</sub>

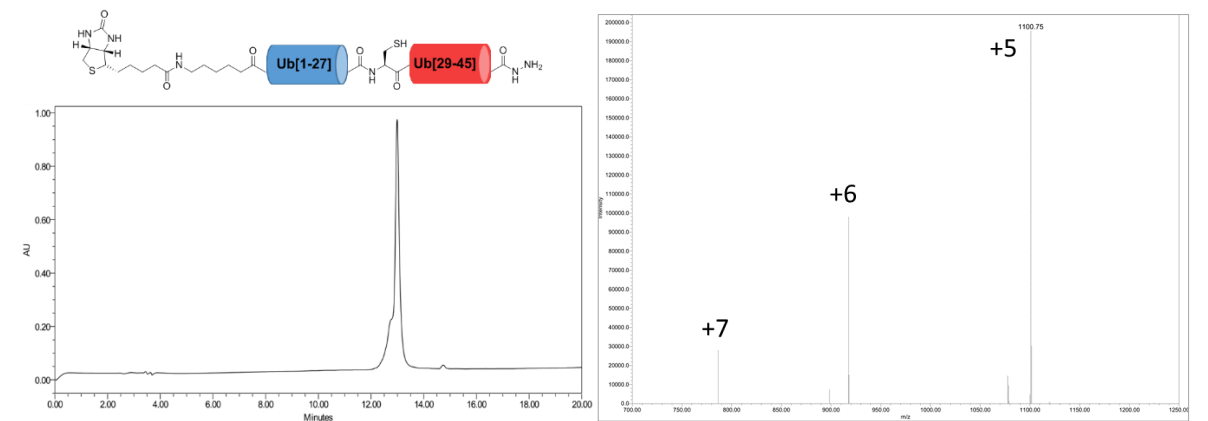

### Ub[46-72]-Leu-Arg-Gly-(A<sup>46</sup>C)-NH-NH<sub>2</sub>

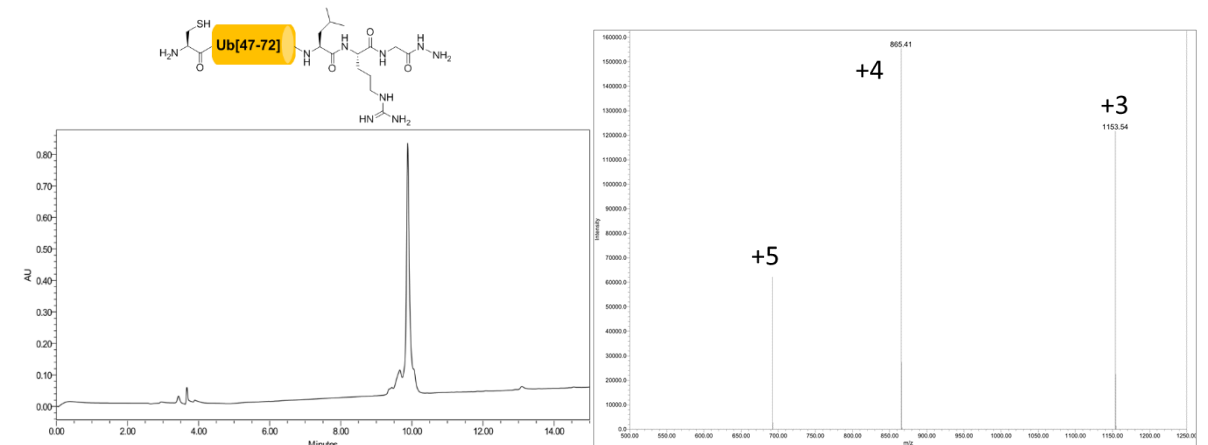

### Ub[1-72]-Leu-Arg-Gly-(A<sup>28</sup>C,A<sup>46</sup>C)-NH-NH<sub>2</sub>

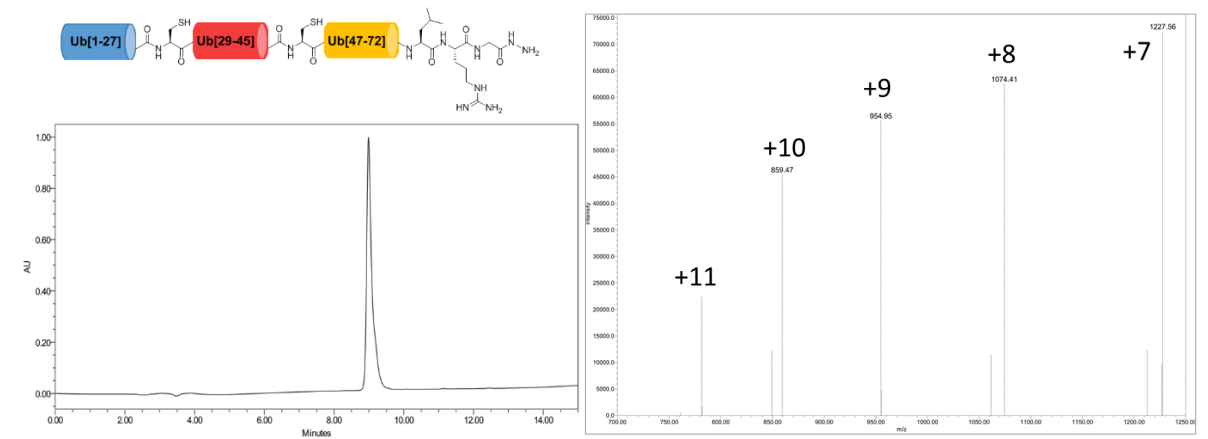

### Ub[1-72]-Leu-Arg-Gly-NH-NH<sub>2</sub>

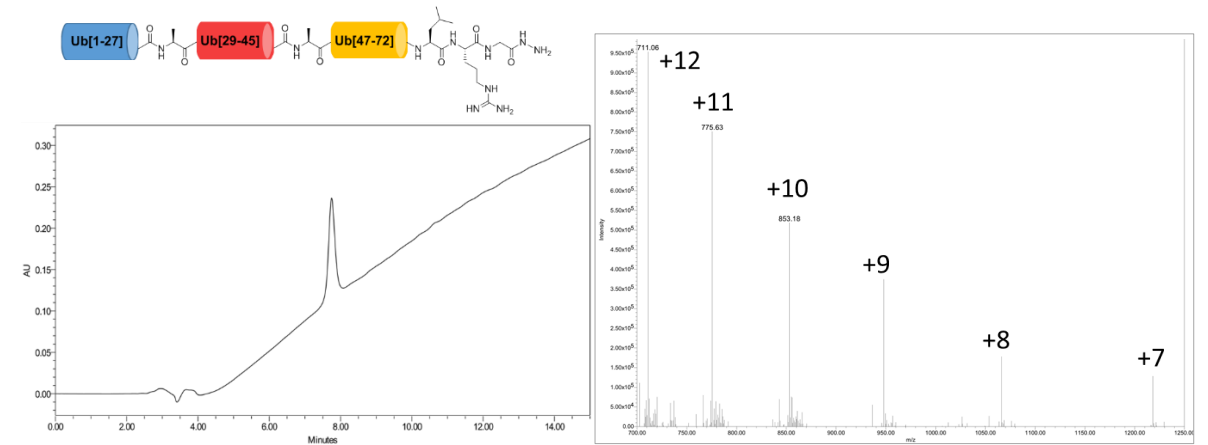

### Biot-6-Ahx-Ub[1-72]-Leu-Arg-Gly-(A<sup>28</sup>C,A<sup>46</sup>C)-NH-NH<sub>2</sub>

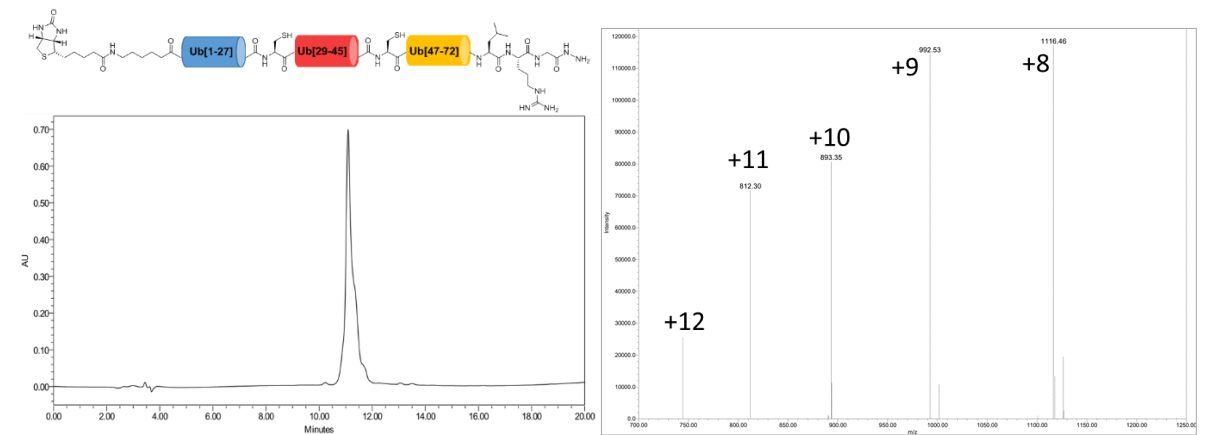





### Ub[1-72]-Tle-Phg-Gly-NH-NH<sub>2</sub>

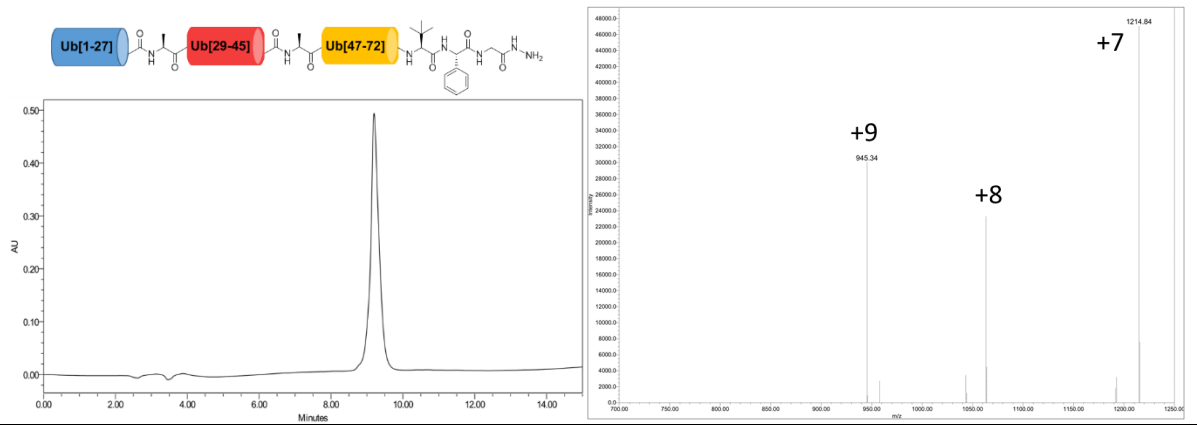

### Biot-6-Ahx-Ub[1-72]-Tle-Phg-Gly-(A<sup>28</sup>C,A<sup>46</sup>C)-NH-NH<sub>2</sub>

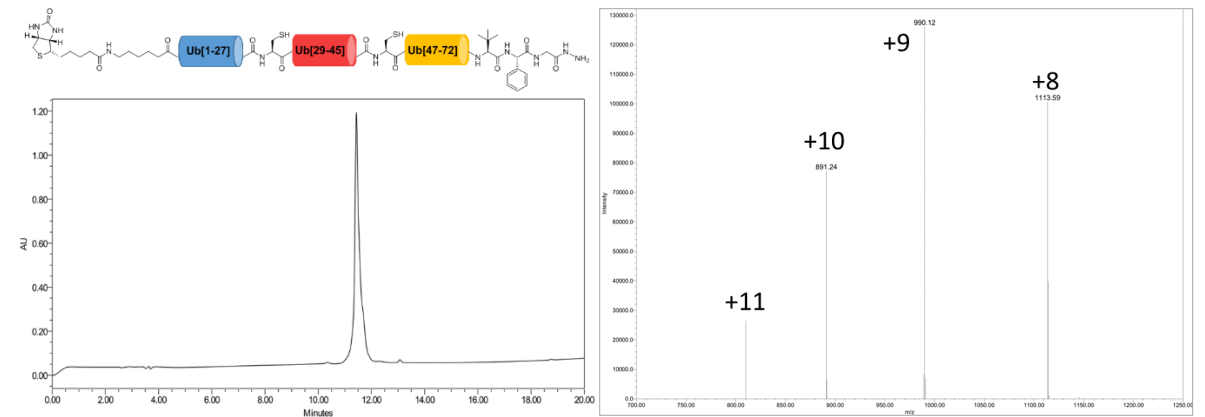

### Biot-6-Ahx-Ub[1-72]-Tle-Phg-Gly-NH-NH<sub>2</sub>

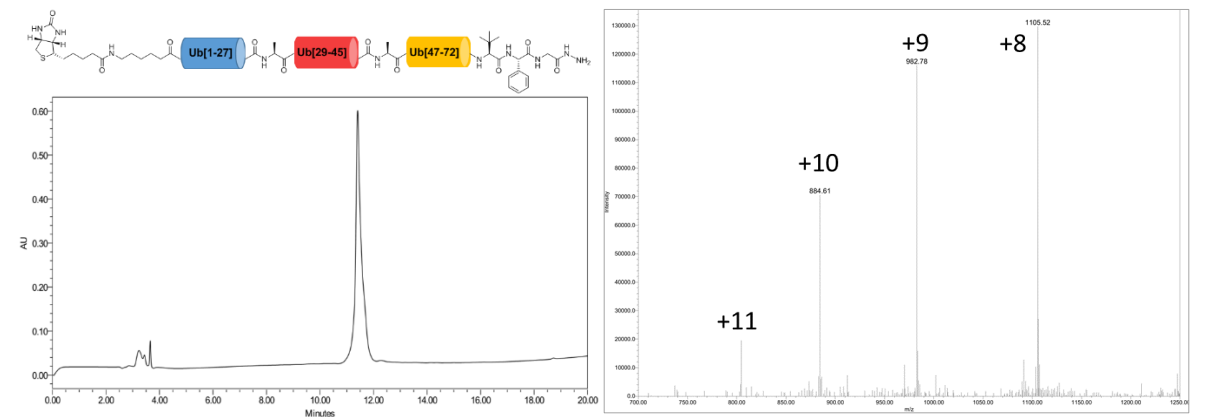

**Ub[46-72]-Cha-Arg-Abu-(A<sup>46</sup>C)-NH-NH<sub>2</sub>**

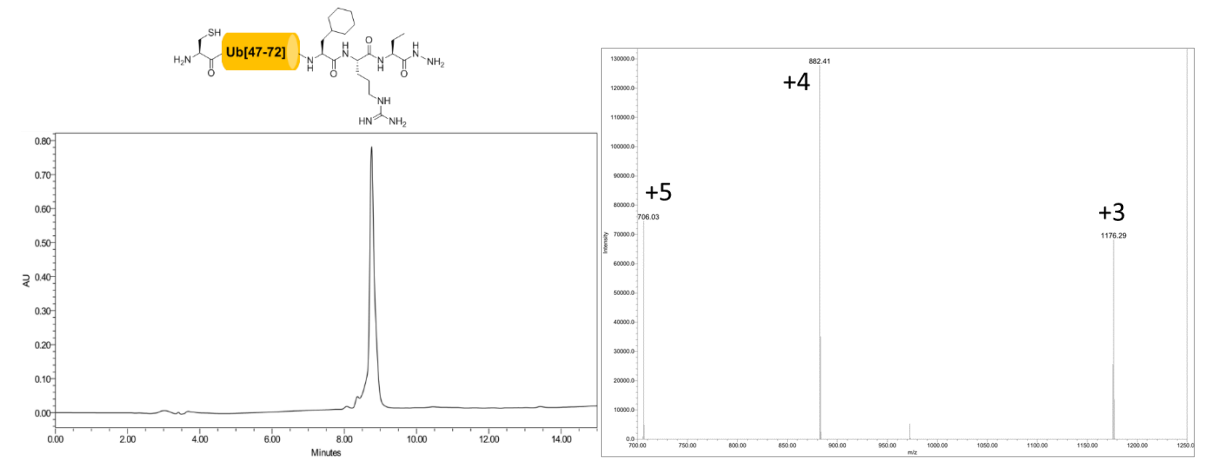

**Ub[1-72]-Cha-Arg-Abu-(A<sup>28</sup>C,A<sup>46</sup>C)-NH-NH<sub>2</sub>**

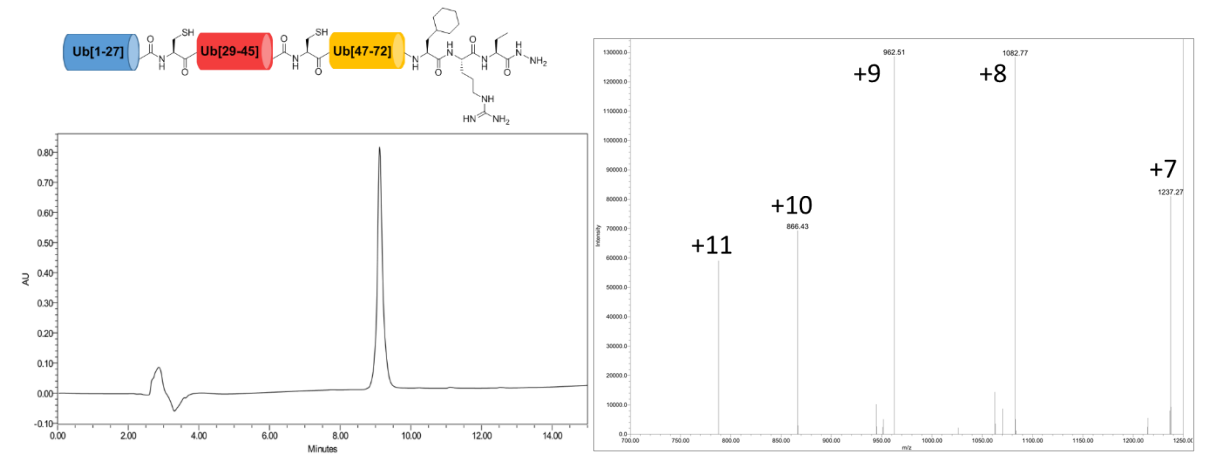

**Ub[1-72]-Cha-Arg-Abu-NH-NH<sub>2</sub>**

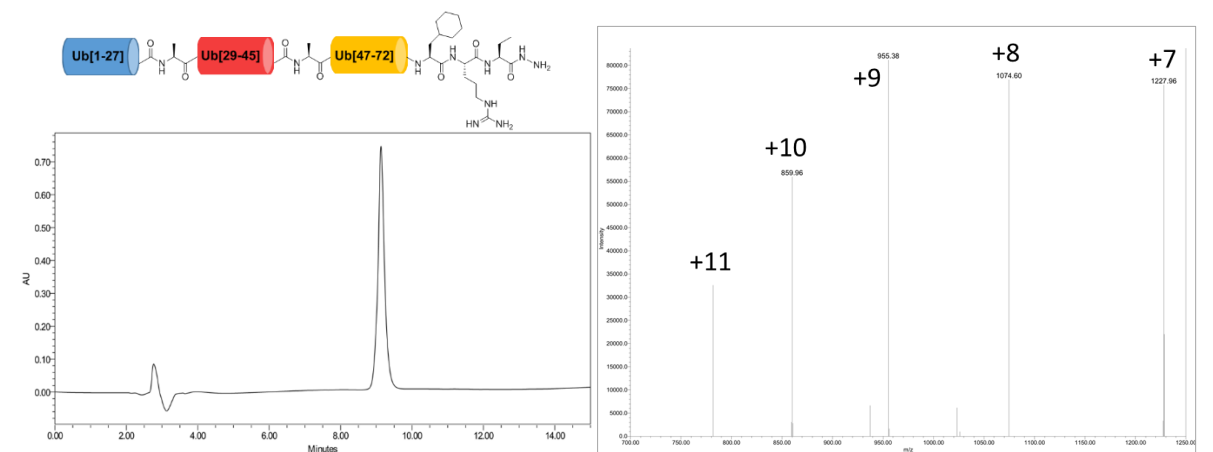



**Ub[1-72]-DArg-Phe(guan)-Ala-(A<sup>28</sup>C,A<sup>46</sup>C)-NH-NH<sub>2</sub>**

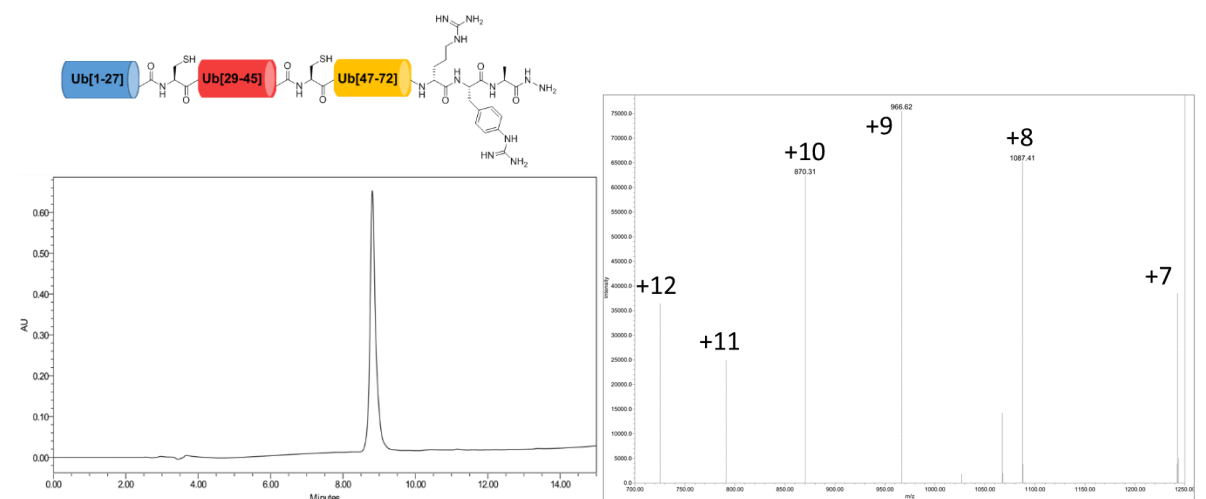

**Ub[1-72]-DArg-Phe(guan)-Ala-NH-NH<sub>2</sub>**

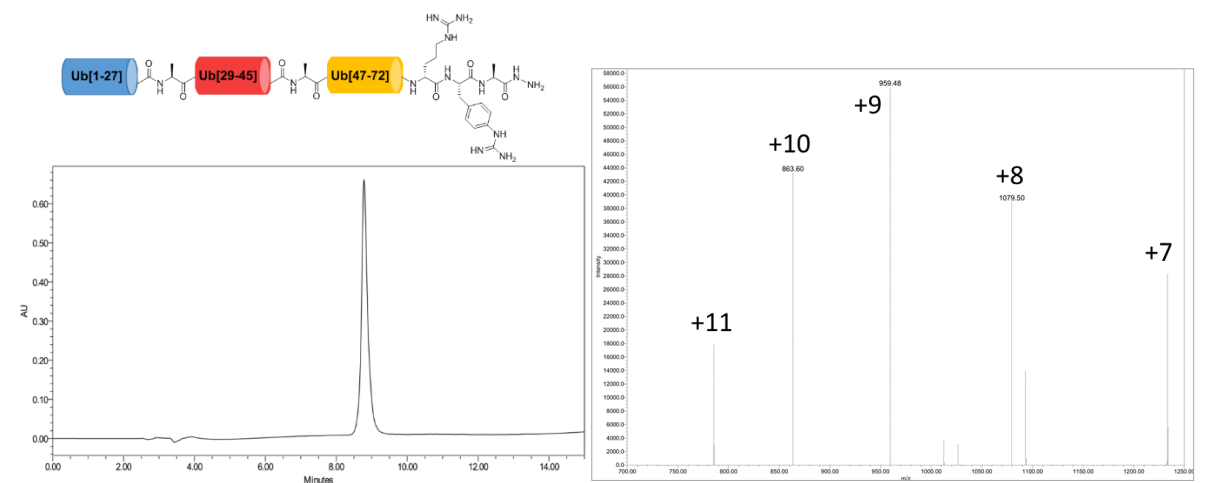

**Biot-6-Ahx-Ub[1-72]-DArg-Phe(guan)-Ala-(A<sup>28</sup>C,A<sup>46</sup>C)-NH-NH<sub>2</sub>**

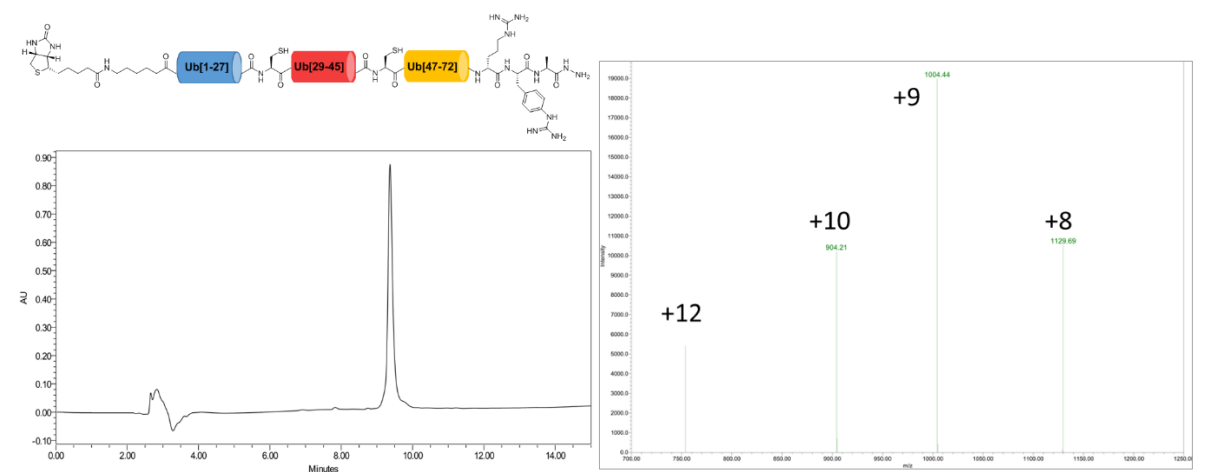

# Biot-6-Ahx-Ub[1-72]-DArg-Phe(guan)-Ala-NH-NH<sub>2</sub>

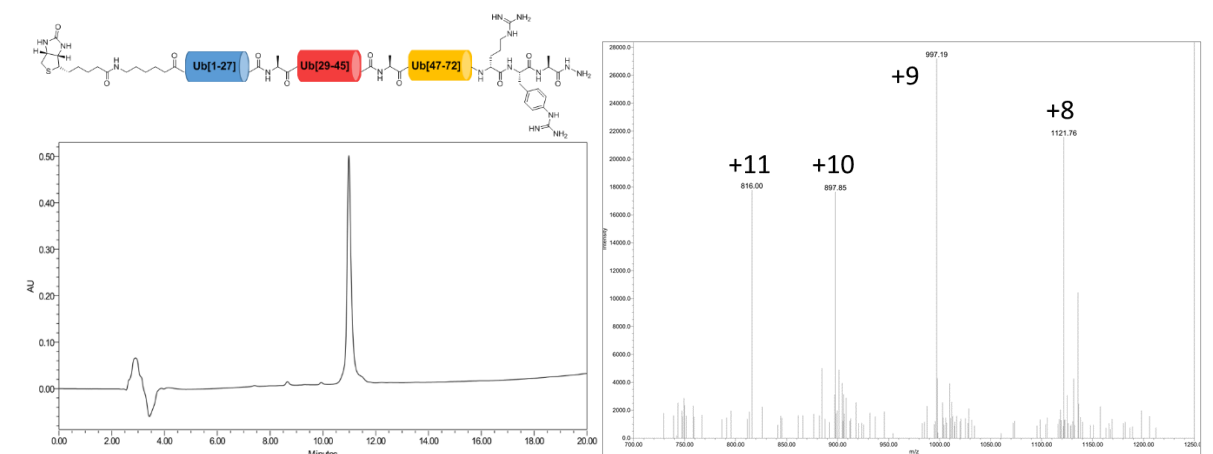



## C-terminal derivatization with the H<sub>2</sub>N-Gly-VME warhead

Shown on the example of Biot-6-Ahx-Ub-VME synthesis.

**Step 1:** acyl hydrazide to azide conversion using NaNO<sub>2</sub>

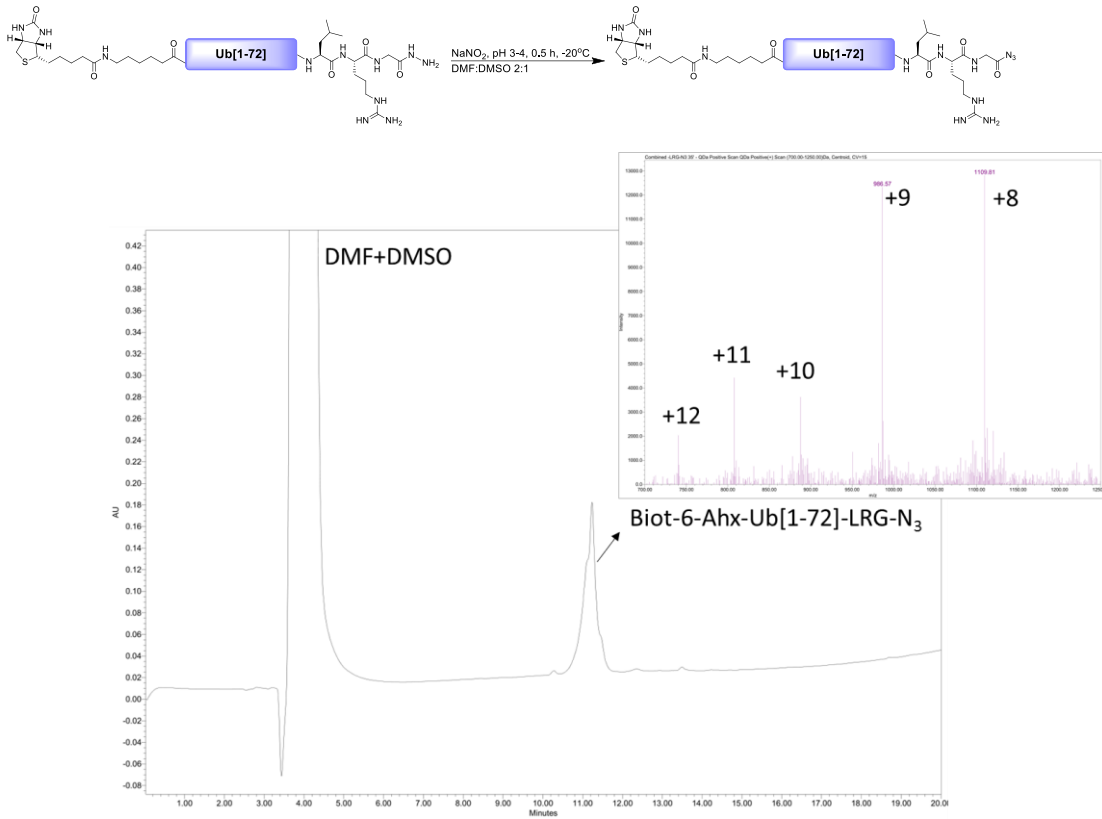

**Step 2:** H<sub>2</sub>N-Gly-VME coupling

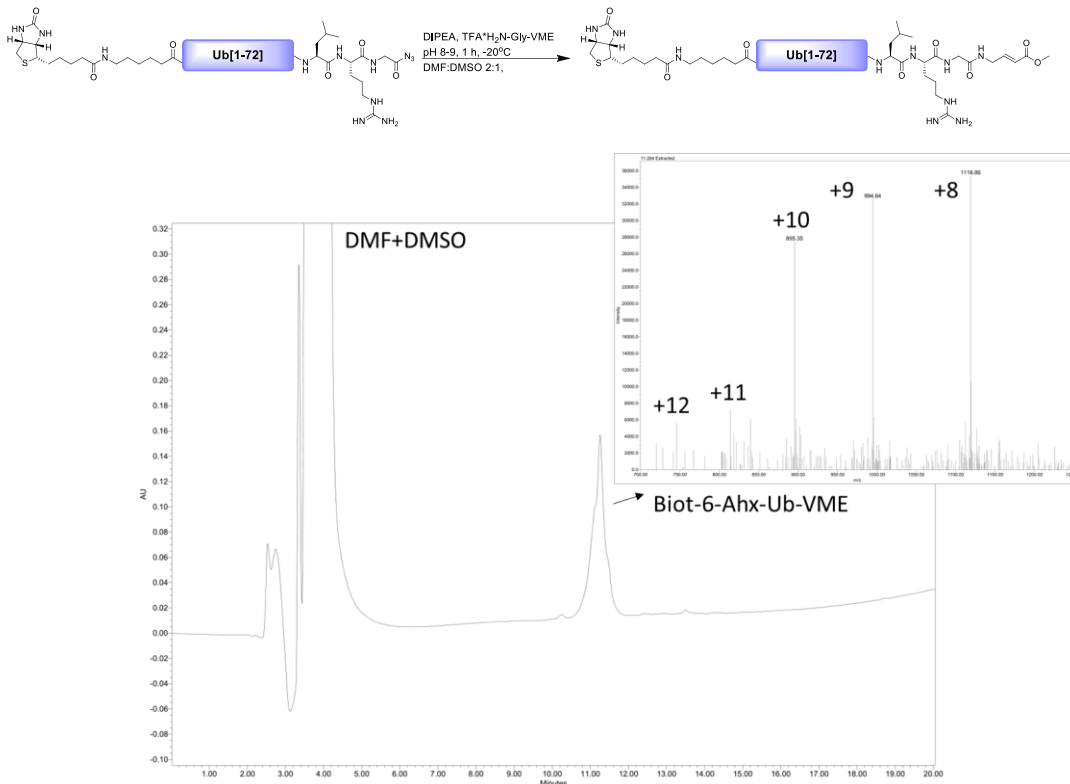

Supplement: d0sc01347a1.pdf [file d0sc01347a1.pdf]
